# Supplementary material for: Phosphate selective binding and sensing by halogen bonding tripodal copper(ii) metallo-receptors in aqueous media
Source: Royal Society of Chemistry journal article supplement (doi:10.1039/d4dt01585a), 2024-01-01
Supplement: d4dt01585a1.pdf [file d4dt01585a1.pdf]

## Supporting Information for

### Phosphate Selective Binding and Sensing by Halogen Bonding Tripodal Cu(II) Metallo-receptors in Aqueous Media.

Hena Bagha, Robert Hein, Jason Y. C. Lim, William K. Myers, Mark R. Sambrook and Paul D. Beer\*

Email: [paul.beer@chem.ox.ac.uk](mailto:paul.beer@chem.ox.ac.uk)

#### Contents

|     |                                                               |    |
|-----|---------------------------------------------------------------|----|
| S1. | General Considerations .....                                  | 2  |
| S2. | Experimental Procedures.....                                  | 3  |
| S3. | Characterisation Data .....                                   | 15 |
| S4. | Isothermal Titration Calorimetry (ITC) Studies and Data ..... | 38 |
| S5. | UV-vis Experiments .....                                      | 41 |
| S6. | EPR Experiments.....                                          | 44 |
| S7. | Electrochemical Anion Sensing Studies .....                   | 45 |
| S8. | References.....                                               | 51 |

## S1. General Considerations

### S1.1 Solvents and Reagents

All solvents and reagents were purchased from commercial suppliers and used without further purification. Dry solvents were obtained by passing through a MBraun MPSP-800 column, degassed with nitrogen and used immediately. Water was de-ionized and micro filtered using a Milli-Q<sup>®</sup> Millipore machine. All tetrabutylammonium (TBA) salts as well as  $[\text{Cu}(\text{MeCN})_4][\text{PF}_6]$ , and  $\text{Cu}(\text{OTf})_2$  were stored in a vacuum desiccator at room temperature with  $\text{P}_2\text{O}_5$  desiccant prior to use. Triethylamine was distilled from and stored over KOH pellets. Thin layer chromatography (TLC) analysis was performed using Merck<sup>®</sup> aluminium-backed DC 60 F254 0.2 mm silica pre-coated plates, with spots visualised under UV light (254 nm) and/ or staining with basified aqueous  $\text{KMnO}_4$  solution followed by gentle heating. Column chromatography was undertaken on Merck<sup>®</sup> silica gel 60 under a positive pressure of nitrogen. Preparative TLC was performed using Analtech glass-backed pre-coated plates (20 × 20 cm, 0.1 cm silica thickness). Where mixtures of solvents were used, ratios are reported by volume. Any literature procedures used to prepare known compounds are referenced in the text. Tris(benzyltriazolemethyl)amine (TBTA) was synthesised as described<sup>1</sup> and stored under ambient conditions.

### S1.2 Instrumentation

$^1\text{H}$  and  $^{13}\text{C}$  NMR spectra were recorded using Bruker Avance III 400 HD nanobay NMR spectrometers (Hg400 or Venus400) each equipped with a 9.4 T magnet, or a Bruker Avance III 500 machine (AVD500) equipped with a 11.75 T magnet (and cryoprobe) at  $T = 298$  K. Chemical shifts are quoted in parts per million (ppm) relative to the residual solvent peak. Low and high resolution ESI mass spectra were recorded on a Waters LCT premier spectrometer and a Bruker  $\mu\text{TOF}$  spectrometer respectively. All pH measurements of solutions of complexes in aqueous and aqueous-organic media were performed using a Hanna<sup>®</sup> pH meter. Isothermal titration calorimetry experiments were performed on a Microcal PEAQ-ITC automated system. EPR spectra were recorded using a Bruker EMXmicro continuous wave (CW) spectrometer (X-band) at  $T = 85$  K. UV-vis spectra were recorded on a T60U (PG Instruments Ltd) spectrophotometer at  $T = 293$  K, using a Hellma quartz cuvette with path length of 1 cm.

## S2. Experimental Procedures

### Tris(TEG)-appended HB Cu(II) tripod, **1H**·2OTf

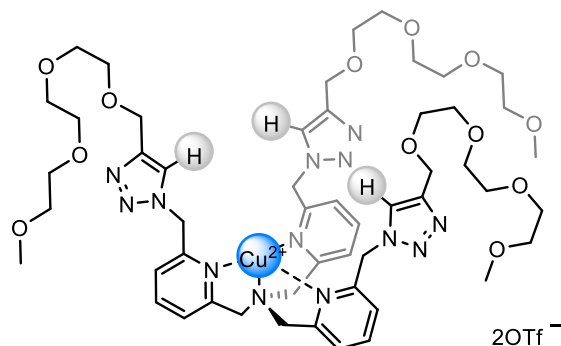

To tripodal ligand **6H** (205 mg, 0.2 mmol) in a 1:1 mixture of CH<sub>2</sub>Cl<sub>2</sub>/MeOH (6 mL) was added copper(II) trifluoromethanesulfonate (72.3 mg, 0.2 mmol) and the solution stirred at room temperature under a N<sub>2</sub> atmosphere for 3 hours. Removal of the solvent *in vacuo* afforded metallo-tripodal receptor **1H**·2OTf as a deep blue oil, which solidified to a dark blue crystalline residue upon drying under high vacuum (274 mg, quantitative). **UV-vis** (CH<sub>3</sub>CN/ H<sub>2</sub>O 6:4 v/v, 10 mM HEPES,  $\lambda_{max}$ / nm, ( $\epsilon$ / M<sup>-1</sup> cm<sup>-1</sup>)): 639 (125), 760 (98); **EPR** (CH<sub>3</sub>CN/ H<sub>2</sub>O 6:4 v/v, 10 mM HEPES, 85 K):  $g_{||} = 2.225$ ,  $g_{\perp} = 2.065$ ,  $A_{||} = 182.0 \times 10^{-4}$  cm<sup>-1</sup>; **HR-MS** (ESI +ve)  $m/z$ : 562.24714 ([M - 2OTf]<sup>2+</sup>, C<sub>51</sub>H<sub>75</sub>N<sub>13</sub>O<sub>12</sub><sup>63</sup>Cu calc. 562.24716).

### Tris(TEG)-appended XB Cu(II) tripod, **1I**·2OTf

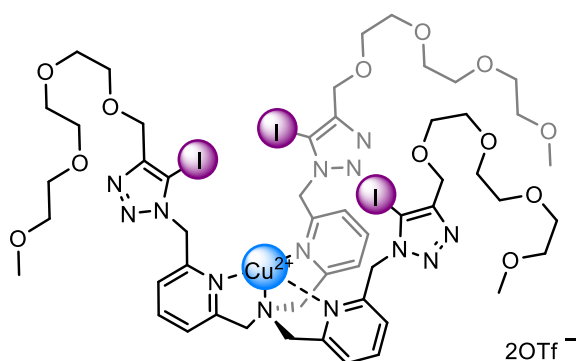

To tripodal ligand **6I** (199 mg, 0.139 mmol) in a 1:1 mixture of CH<sub>2</sub>Cl<sub>2</sub>/MeOH (6 mL) was added copper(II) trifluoromethanesulfonate (50.3 mg, 0.139 mmol) and the solution stirred at room temperature under a N<sub>2</sub> atmosphere for 3 hours. Removal of the solvent *in vacuo* afforded metallo-tripodal receptor **1I**·2OTf as a deep blue oil, which solidified to a dark blue crystalline residue upon drying under high vacuum (248 mg, quantitative). **UV-vis** (CH<sub>3</sub>CN/ H<sub>2</sub>O 6:4 v/v, 10 mM HEPES,  $\lambda_{max}$ / nm, ( $\epsilon$ / M<sup>-1</sup> cm<sup>-1</sup>)): 647 (117), 775 (91); **EPR** (CH<sub>3</sub>CN/ H<sub>2</sub>O 6:4 v/v, 10

mM HEPES, 85 K):  $g_{\parallel} = 2.225$ ,  $g_{\perp} = 2.065$ ,  $A_{\parallel} = 183.0 \times 10^{-4} \text{ cm}^{-1}$ ; **HR-MS** (ESI +ve)  $m/z$ : 751.09167 ( $[M - 2\text{OTf}]^{2+}$ ,  $\text{C}_{51}\text{H}_{72}\text{N}_{13}\text{O}_{12}\text{I}_3^{63}\text{Cu}$  calc. 751.09212).

(6-(azidomethyl)pyridine-2-yl)methanol, **2**<sup>2</sup>

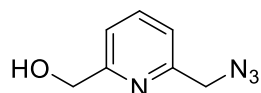

This literature compound was prepared using modified synthetic procedures: to a solution of **1** (1.58 g, 7.82 mmol) in dry, degassed DMF (40 mL) was added  $\text{NaN}_3$  (1.02 g, 15.6 mmol) and the reaction stirred under a  $\text{N}_2$  atmosphere at 80 °C overnight. Thereafter, azeotropic removal of the solvent *in vacuo* with toluene produced a dark yellow residue which was redissolved in ethyl acetate (20 mL). The resultant precipitate was removed *via* filtration through a pad of celite and the celite thoroughly washed with ethyl acetate. Removal of the solvent *in vacuo* afforded the target compound **2** in excellent purity as a deep yellow oil which was dried *in vacuo* at less than 7 mbar for 2 days (1.13 g, 88 % yield). **<sup>1</sup>H NMR** (400 MHz,  $\text{CDCl}_3$ )  $\delta$  (ppm): 7.73 (1H, t,  $^3J = 8.0$  Hz, pyridine ArH), 7.26 (1H, d,  $^3J = 8.0$  Hz, pyridine ArH), 7.22 (1H, d,  $^3J = 8.0$  Hz, pyridine ArH), 4.78 (2H, s, pyridine  $\text{CH}_2$ ), 4.49 (2H, s, pyridine  $\text{CH}_2$ ), 3.70 (1H, br. s,  $\text{CH}_2\text{-OH}$ ); **<sup>13</sup>C NMR** (125 MHz,  $\text{CDCl}_3$ )  $\delta$  (ppm): 159.4, 154.5, 137.5, 120.3, 119.6, 63.8, 54.9; **LR-MS** (ESI +ve)  $m/z$ : 165.1 ( $[M+H]^+$ ,  $\text{C}_7\text{H}_9\text{N}_4\text{O}$  calc. 165.1)

2,5,8,11-tetraoxatetradec-13-yne, **3**<sup>3</sup>

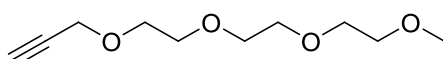

To a stirring solution of triethylene glycol monomethyl ether (2.0 g, 12.2 mmol) in dry degassed THF (3 mL) at 0 °C, was added a suspension of potassium *tert*-butoxide (1.56 g, 13.9 mmol) in 25 mL THF. Separately 1.82 mL of propargyl bromide (24.2 mmol) was dissolved in THF (50 mL) and then added dropwise to the solution. The reaction mixture was stirred at room temperature under a  $\text{N}_2$  atmosphere for 24 h. Thereafter, ethyl acetate (200 mL) was added and the organics washed with brine (3 x 75 mL). The separated organic layer was dried over  $\text{MgSO}_4$  and filtered. Removal of the solvent *in vacuo* afforded **12** in good purity as a pale yellow oil (1.69 g, 69 %). **<sup>1</sup>H NMR** (500 MHz,  $\text{CDCl}_3$ )  $\delta$  (ppm): 4.21 (2H, d,  $^4J = 2.4$  Hz,  $\text{CH}_2\text{C}\equiv\text{C}$ ), 3.55 – 3.71 (12H, m, TEG alkyl- $\text{CH}_2$ ), 3.38 (3H, s, TEG alkyl- $\text{CH}_3$ ), 2.43 (1H, t,  $^4J = 2.4$  Hz,  $\text{C}\equiv\text{CH}$ ); **<sup>13</sup>C NMR** (125 MHz,  $\text{CDCl}_3$ )  $\delta$  (ppm): 79.6, 74.4, 71.9, 70.6, 70.5, 70.4, 69.0,

59.0, 58.3, one peak missing, presumed overlapped; **HR-MS** (ESI +ve)  $m/z$ : 203.12779 ( $[M + H]^+$ ,  $C_{10}H_{19}O_4$  calc. 203.12779).

TEG-appended HB 'hydroxy-arm' precursor, **4H**

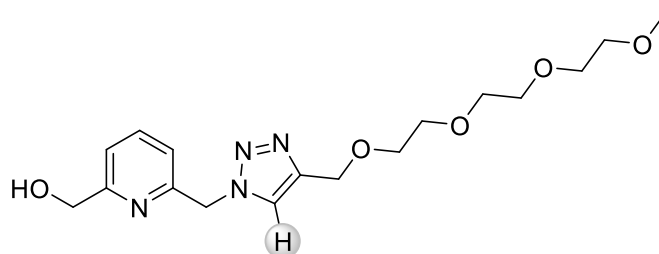

To a solution of (6-(azidomethyl)pyridine-2-yl)methanol **2** (350 mg, 2.13 mmol) and TEG alkyne **3** (431 mg, 2.13 mmol) in dry degassed THF (5 mL) was added  $[Cu(MeCN)_4][PF_6]$  (397 mg, 1.07 mmol) and diisopropylethylamine (DIPEA) (0.18 mL, 1.07 mmol) and the mixture stirred at room temperature under a  $N_2$  atmosphere for 2 days. The reaction mixture was diluted with  $CH_2Cl_2$  (25 mL) and washed with  $NH_4OH_{(aq)}$  (3 x 20 mL), brine (2 x 20 mL) and dried over  $MgSO_4$ . After removal of the solvent *in vacuo*, purification by silica gel column chromatography (gradient from pure  $CH_2Cl_2$  to 4 % MeOH in  $CH_2Cl_2$ ) afforded **4H** as a pale yellow oil (312 mg, 40 %).  **$^1H$  NMR** (500 MHz,  $CDCl_3$ )  $\delta$  (ppm): 7.73 (1H, s, triazole  $CH$ ), 7.69 (1H, t,  $^3J = 7.7$  Hz, pyridine  $ArH$ ), 7.24 (1H, d,  $^3J = 7.8$  Hz, pyridine  $ArH$ ), 7.09 (1H, d,  $^3J = 7.6$  Hz, pyridine  $ArH$ ), 5.66 (2H, s,  $CH_2-N$  triazole), 4.77 (2H, d,  $^3J = 5.2$  Hz,  $CH_2OH$ ), 4.70 (2H, s,  $CH_2-C$  triazole), 3.53–3.71 (13H, m, TEG alkyl- $CH_2 + OH$ ), 3.36 (3H, s, TEG alkyl- $CH_3$ );  **$^{13}C$  NMR** (125 MHz,  $CDCl_3$ )  $\delta$  (ppm): 159.9, 153.2, 145.3, 137.8, 123.2, 120.6, 120.0, 71.6, 70.3, 70.3, 70.3, 70.2, 69.5, 64.4, 64.0, 58.7, 55.1; **HR-MS** (ESI +ve)  $m/z$ : 367.19698 ( $[M + H]^+$ ,  $C_{17}H_{27}O_5N_4$  calc. 367.19760).

TEG-appended XB 'hydroxy-arm' precursor, **4I**

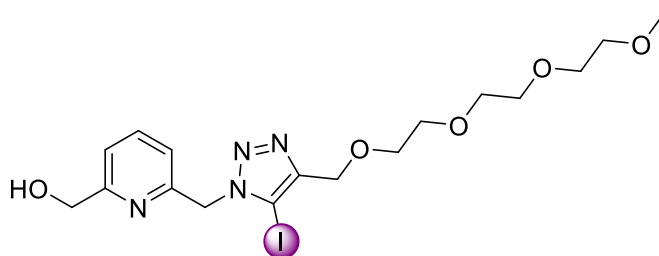

(6-(azidomethyl)pyridine-2-yl)methanol **2** (272 mg, 1.66 mmol) was dissolved in a 1:1 mixture of dry, degassed THF/ $CH_3CN$  (5 mL) and the reaction vessel covered in foil. Sodium iodide (995 mg, 6.64 mmol) and copper(II) perchlorate hexahydrate (1.23 g, 3.32 mmol) were added

and the solution stirred for 5 minutes. Further added were TBTA (17.6 mg, 0.033 mmol), DBU (252 mg, 1.66 mmol, in 0.5 mL 1:1 THF/CH<sub>3</sub>CN) and TEG alkyne **3** (335 mg, 1.66 mmol, in 0.5 ml 1:1 THF/CH<sub>3</sub>CN) and the mixture stirred at room temperature under a N<sub>2</sub> atmosphere overnight. The reaction mixture was diluted with CH<sub>2</sub>Cl<sub>2</sub> (25 mL) and washed with NH<sub>4</sub>OH<sub>(aq)</sub> (3 x 20 mL), brine (2 x 20 mL) and dried over MgSO<sub>4</sub>. After removal of the solvent *in vacuo*, purification by silica gel column chromatography (gradient from pure CH<sub>2</sub>Cl<sub>2</sub> to 3 % MeOH in CH<sub>2</sub>Cl<sub>2</sub>) afforded **4I** as a pale orange oil which solidified to an off-white solid upon standing overnight (522 mg, 64 %). **<sup>1</sup>H NMR** (500 MHz, CDCl<sub>3</sub>) δ (ppm): 7.68 (1H, t, <sup>3</sup>J = 7.8 Hz, pyridine ArH), 7.20 (1H, d, <sup>3</sup>J = 7.6 Hz, pyridine ArH), 6.93 (1H, d, <sup>3</sup>J = 7.6 Hz, pyridine ArH), 5.75 (2H, s, CH<sub>2</sub>-N iodotriazole), 4.75 (2H, d, <sup>3</sup>J = 5.0 Hz, CH<sub>2</sub>OH), 4.66 (2H, s, CH<sub>2</sub>-C iodotriazole), 3.54–3.71 (13H, m, TEG alkyl-CH<sub>2</sub> + OH), 3.37 (3H, s, TEG alkyl-CH<sub>3</sub>); **<sup>13</sup>C NMR** (125 MHz, CDCl<sub>3</sub>) δ (ppm): 159.2, 152.9, 148.9, 137.8, 120.2, 119.9, 81.4, 71.9, 70.6, 70.5, 70.4, 69.7, 64.3, 63.8, 59.0, 55.2; one peak missing, presumed overlapped; **HR-MS** (ESI +ve) *m/z*: 493.09458 ([M + H]<sup>+</sup>, C<sub>17</sub>H<sub>26</sub>O<sub>5</sub>N<sub>4</sub>I calc. 493.09424).

TEG-appended HB 'chloro-arm' precursor, **5H**

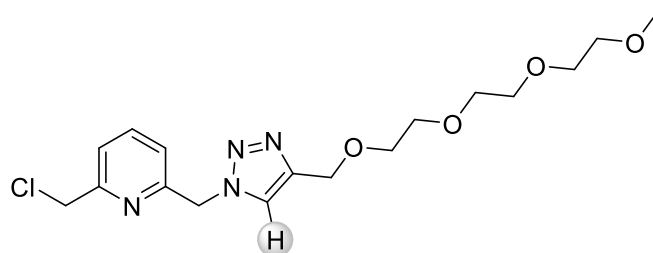

To a solution of **4H** (974 mg, 2.66 mmol) in dry CH<sub>2</sub>Cl<sub>2</sub> (20 ml) at 0 °C, was slowly added SOCl<sub>2</sub> (0.29 ml, 3.99 mmol) and the reaction stirred at room temperature under a N<sub>2</sub> atmosphere for 6 hrs. The stirring mixture was carefully quenched and neutralised by the slow addition of a saturated Na<sub>2</sub>CO<sub>3(aq)</sub> solution at 0 °C resulting in vigorous gas evolution. Thereafter, the biphasic mixture was further diluted with CH<sub>2</sub>Cl<sub>2</sub> (25 ml) and washed with H<sub>2</sub>O (2 x 25 ml). The organic layer was dried over MgSO<sub>4</sub> and the solvent removed *in vacuo*. Purification using silica gel column chromatography (gradient from pure CH<sub>2</sub>Cl<sub>2</sub> to 3 % MeOH in CH<sub>2</sub>Cl<sub>2</sub>) afforded the chloro-arm **5H** as a clear, light orange oil (879 mg, 86 %). **<sup>1</sup>H NMR** (500 MHz, CDCl<sub>3</sub>) δ (ppm): 7.74 (1H, s, triazole CH), 7.72 (1H, t, <sup>3</sup>J = 7.78 Hz, pyridine ArH), 7.45 (1H, d, <sup>3</sup>J = 7.78 Hz, pyridine ArH), 7.11 (1H, d, <sup>3</sup>J = 7.76 Hz, pyridine ArH), 5.65 (2H, s, CH<sub>2</sub>-N triazole), 4.70 (2H, s, CH<sub>2</sub>-C triazole), 4.66 (2H, s, CH<sub>2</sub>Cl), 3.53–3.71 (12H, m, TEG alkyl-CH<sub>2</sub>), 3.37 (3H, s, TEG alkyl-CH<sub>3</sub>); **<sup>13</sup>C NMR** (125 MHz, CDCl<sub>3</sub>) δ (ppm): 156.7, 154.1, 145.6, 138.3, 123.2, 122.3, 121.4, 71.8, 70.5, 70.4, 70.4, 70.4, 69.6, 64.6, 58.9, 55.2, 46.2; **HR-MS** (ESI +ve) *m/z*: 385.16367 ([M + H]<sup>+</sup>, C<sub>17</sub>H<sub>26</sub>N<sub>4</sub>O<sub>4</sub>Cl calc. 385.16371).

### TEG-appended XB 'chloro-arm' precursor, **5I**

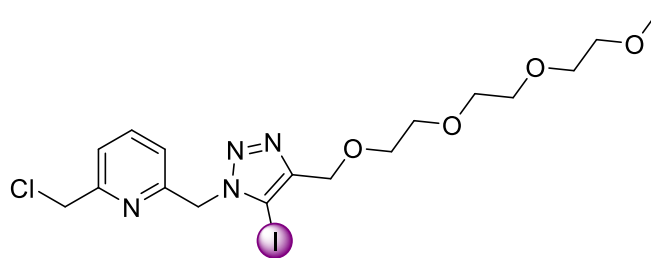

To a solution of **4I** (1.42 g, 2.88 mmol) in dry  $\text{CH}_2\text{Cl}_2$  (25 ml) at 0 °C, was slowly added  $\text{SOCl}_2$  (0.32 ml, 4.32 mmol) and the reaction stirred at room temperature under a  $\text{N}_2$  atmosphere for 6 hrs. The stirring mixture was carefully quenched and neutralised by the slow addition of a saturated  $\text{Na}_2\text{CO}_{3(\text{aq})}$  solution at 0 °C resulting in vigorous gas evolution. Thereafter, the biphasic mixture was further diluted with  $\text{CH}_2\text{Cl}_2$  (25 ml) and washed with  $\text{H}_2\text{O}$  (2 x 25 ml). The organic layer was dried over  $\text{MgSO}_4$  and the solvent removed *in vacuo*. Purification using silica gel column chromatography (gradient from pure  $\text{CH}_2\text{Cl}_2$  to 3 % MeOH in  $\text{CH}_2\text{Cl}_2$ ) afforded the chloro-arm **5I** as a clear, amber oil (1.19 g, 81 %).  **$^1\text{H NMR}$**  (500 MHz,  $\text{CDCl}_3$ )  $\delta$  (ppm): 7.70 (1H, t,  $^3J = 7.8$  Hz, pyridine ArH), 7.44 (1H, d,  $^3J = 7.8$  Hz, pyridine ArH), 6.85 (1H, d,  $^3J = 7.8$  Hz, pyridine ArH), 5.74 (2H, s,  $\text{CH}_2\text{-N}$  iodotriazole), 4.67 (2H, s,  $\text{CH}_2\text{-C}$  iodotriazole), 4.66 (2H, s,  $\text{CH}_2\text{Cl}$ ), 3.55–3.71 (12H, m, TEG alkyl- $\text{CH}_2$ ), 3.38 (3H, s, TEG alkyl- $\text{CH}_3$ );  **$^{13}\text{C NMR}$**  (125 MHz,  $\text{CDCl}_3$ )  $\delta$  (ppm): 156.6, 153.8, 148.9, 138.2, 122.1, 120.6, 81.4, 71.9, 70.5, 70.5, 70.4, 69.7, 64.2, 59.0, 55.3, 46.3, one peak missing, presumed overlapped; **HR-MS** (ESI +ve)  $m/z$ : 533.04289 ( $[\text{M} + \text{Na}]^+$ ,  $\text{C}_{17}\text{H}_{24}\text{N}_4\text{O}_4\text{ClINa}$  calc. 533.04230).

### Tris(TEG)-appended HB tripodal ligand, **6H**

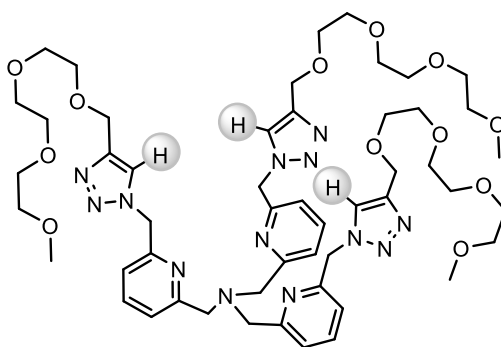

To a solution of **5H** (825 mg, 2.14 mmol) fully dissolved in dry  $\text{CH}_3\text{CN}$  (30 mL) was added  $\text{NH}_4\text{OAc}$  (3.30 g, 42.8 mmol),  $\text{Na}_2\text{CO}_3$  (4.54 g, 42.8 mmol) and  $\text{KI}$  (356 mg, 2.14 mmol) as solid portions. The reaction flask was completely sealed, and the mixture vigorously stirred for two days at room temperature after which no evidence of **5H** was observed by TLC or ESI-

MS analyses. Thereafter, the creamy off-white suspension was directly transferred to a separating funnel and ca. 20 ml H<sub>2</sub>O very gently pipetted into the vessel. The cloudy, lower aqueous layer was separated, and the remaining clear pale yellow organic layer concentrated *in vacuo*. The resultant crude residue was redissolved in CHCl<sub>3</sub> (50 mL) and washed with water (2 x 20 mL) and the organics dried over MgSO<sub>4</sub>. Solvent removal and purification by preparative thin layer chromatography (5 % MeOH in CHCl<sub>3</sub>) afforded the tripodal ligand **6H** as a deep yellow oil (501 mg, 66 % yield). **<sup>1</sup>H NMR** (500 MHz, CDCl<sub>3</sub>) δ (ppm): 7.73 (3H, s, triazole CH), 7.64 (3H, t, <sup>3</sup>J = 7.7 Hz, pyridine ArH), 7.46 (3H, d, <sup>3</sup>J = 7.6 Hz, pyridine ArH), 7.01 (3H, d, <sup>3</sup>J = 7.6 Hz, pyridine ArH), 5.62 (6H, s, CH<sub>2</sub>-N triazole), 4.68 (6H, s, CH<sub>2</sub>-C triazole), 3.86 (6H, s, CH<sub>2</sub>-N tertiary amine), 3.53–3.70 (36 H, m, TEG alkyl-CH<sub>2</sub>), 3.36 (9H, s, TEG alkyl-CH<sub>3</sub>); **<sup>13</sup>C NMR** (125 MHz, CDCl<sub>3</sub>) δ (ppm): 159.4, 153.8, 145.5, 137.7, 123.2, 122.4, 120.5, 71.9, 70.5, 70.5, 70.4, 69.7, 64.6, 59.9, 59.0, 55.5, one peak missing, presumed overlapped. **HR-MS** (ESI +ve) *m/z*: 1062.5746 ([M + H]<sup>+</sup>, C<sub>51</sub>H<sub>76</sub>N<sub>13</sub>O<sub>12</sub> calc.1062.5736).

#### Tris(TEG)-appended XB tripodal ligand, **6I**

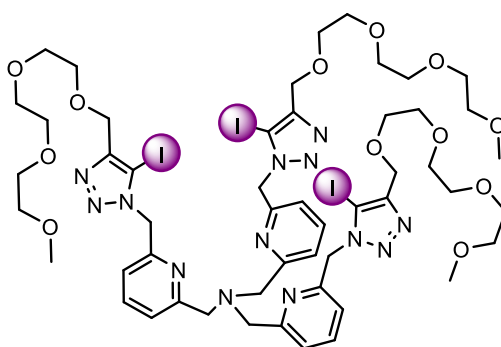

To a solution of **5I** (882 mg, 1.73 mmol) fully dissolved in dry CH<sub>3</sub>CN (30 mL) was added NH<sub>4</sub>OAc (2.67 g, 34.6 mmol), Na<sub>2</sub>CO<sub>3</sub> (3.67 g, 34.6 mmol) and KI (287 mg, 1.73 mmol) as solid portions. The reaction flask was completely sealed, and the mixture vigorously stirred for two days at room temperature after which no evidence of **5I** was observed by TLC or ESI-MS analyses. Thereafter, the creamy off-white suspension was directly transferred to a separating funnel and ca. 20 ml H<sub>2</sub>O very gently pipetted into the vessel. The cloudy, lower aqueous layer was separated, and the remaining clear, light yellow organic layer concentrated *in vacuo*. The resultant crude residue was redissolved in CHCl<sub>3</sub> (50 mL) and washed with water (2 x 20 mL) and the organics dried over MgSO<sub>4</sub>. Solvent removal and purification by preparative thin layer chromatography (6 % MeOH in CH<sub>2</sub>Cl<sub>2</sub>) afforded the tripodal ligand **6I** as a dark yellow oil (497 mg, 60 % yield). **<sup>1</sup>H NMR** (500 MHz, CDCl<sub>3</sub>) δ (ppm): 7.63 (3H, t, <sup>3</sup>J = 7.7 Hz, pyridine ArH), 7.43 (3H, d, <sup>3</sup>J = 7.6 Hz, pyridine ArH), 6.79 (3H, d, <sup>3</sup>J = 7.0 Hz, pyridine ArH), 5.72 (6H, s, CH<sub>2</sub>-N iodotriazole), 4.64 (6H, s, CH<sub>2</sub>-C iodotriazole), 3.84 (6H, s, CH<sub>2</sub>-N tertiary amine), 3.53–



3.68 (36H, m, TEG alkyl- $CH_3$ ), 3.37 (9H, s, TEG-alkyl  $CH_3$ );  $^{13}C$  NMR (125 MHz,  $CDCl_3$ )  $\delta$  (ppm): 159.4, 153.4, 148.8, 137.6, 122.4, 119.7, 81.5, 71.9, 70.6, 70.5, 70.4, 69.7, 64.3, 59.6, 59.0, 55.5, one peak missing, presumed overlapped; **HR-MS** (ESI +ve)  $m/z$ : 1440.2665 ( $[M + H]^+$ ,  $C_{51}H_{73}N_{13}O_{12}$  calc. 1440.2635).

Succinimidyl-3-propiolate, **7**<sup>4</sup>

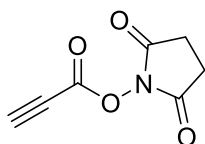

This literature compound was prepared according to modified procedures. To a stirring solution of propiolic acid (0.5 mL, 8 mmol) in dry acetonitrile (50 mL) at 0 °C was added *N*-hydroxysuccinimide (0.92 g, 8 mmol). Separately, dicyclohexylcarbodiimide (DCC) (1.65 g, 8 mmol) was added portion wise to the reaction mixture, which was kept stirring for 8 hours at 4 °C under  $N_2$ . After filtration of the white precipitate under gravity, removal of the solvent *in vacuo* gave the activated ester **7** in excellent purity as a pale yellow oil, which solidified to a crystalline solid upon standing for 1 – 2 hours at room temperature (909 mg, 68 %). (*N.B. due to the unstable nature of the compound, the obtained solid was stored in a vial at -20 °C until further used*).  $^1H$  NMR (500 MHz,  $CDCl_3$ )  $\delta$  (ppm): 3.34 (1H, s,  $C\equiv CH$ ), 2.86 (4H, s,  $COCH_2$ );  $^{13}C$  NMR (125 MHz,  $CDCl_3$ )  $\delta$  (ppm): 168.2, 147.7, 82.1, 70.1, 25.5; **LR-MS** (ESI +ve)  $m/z$ : not observed.

*N.B.* For all of the  $\beta$ -cyclodextrin precursor compounds leading up to the synthesis of the key permethylated  $\beta$ -cyclodextrin (pm $\beta$ CD) alkyne **9**<sup>5</sup> (see Scheme 2, main paper), all mono-functionalisation procedures were carried out at the 6- position on the narrow rim of the truncated cone as shown in Figure S1. Therefore, this numbering system is also used for the assignment of the relevant <sup>1</sup>H NMR signals in the following characterisation data of the novel pm $\beta$ CD compounds **10** – **12I** leading to the synthesis of the tris(pm $\beta$ CD)-appended XB tripod **13I**·2OTf.

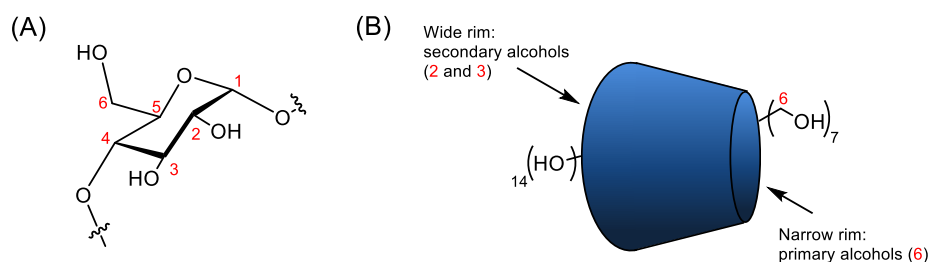

**Figure S1.** (A) Numbering scheme for the glucopyranose units of the  $\beta$ -CD cone and (B) distribution of the primary and secondary alcohol moieties on its narrow and wide rims, respectively.

It should be further noted that by convention, in a mono-substituted  $\beta$ -CD derivative, the functionalised glucopyranose unit is denoted A, with the remaining units labelled B-G. 6<sup>A</sup>-substituted therefore means that Carbon 6 of glucopyranose unit A is functionalised.

6<sup>A</sup>-amido-pm $\beta$ CD alkyne, **9**

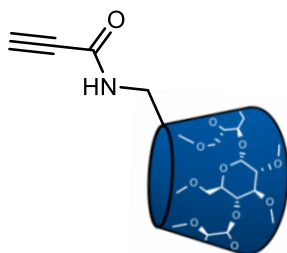

To a solution of succinimidyl-3-propiolate **7**<sup>4</sup> (82.3 mg, 0.494 mmol) and permethylated  $\beta$ -cyclodextrin amine **8**<sup>6</sup> (500 mg, 0.353 mmol) in dry  $\text{CH}_2\text{Cl}_2$  was added 4-dimethylaminopyridine (DMAP) (10 mg, 0.08 mmol). The mixture was left to stir at room temperature under a  $\text{N}_2$  atmosphere overnight, after which no evidence of the permethylated  $\beta$ -cyclodextrin amine was observed by TLC or ESI-MS. After removal of the solvent *in vacuo*, purification by silica gel

column chromatography (4 % MeOH in EtOAc) afforded **9** as a crystalline white solid (362 mg, 70 %). **<sup>1</sup>H NMR** (500 MHz, CDCl<sub>3</sub>) δ (ppm): 6.74 (1H, t, <sup>3</sup>J = 5.9 Hz, amide NH), 5.08–5.18 (7H, m, β-CD H<sub>1</sub>), 3.17–4.08 (102H, m, β-CD H<sub>2-6</sub> + CH<sub>3</sub>O), 2.84 (1H, s, C≡CH); **<sup>13</sup>C NMR** (125 MHz, CDCl<sub>3</sub>) δ (ppm): 152.2, β-CD signals consistent with loss of C7 symmetry: (99.2–98.6; β-CD C<sub>1</sub>), 82.1–81.3, 80.6–79.8, 77.7, 73.0, 71.5–70.1, 61.6–61.2, 59.5–58.3; **HR-MS** (ESI +ve) *m/z*: 1488.67853 ([M + Na]<sup>+</sup>, C<sub>65</sub>H<sub>111</sub>NO<sub>35</sub>Na calc. 1488.68288).

6<sup>A</sup>-amido-pmβCD-appended XB 'hydroxy-arm' precursor, **10I**

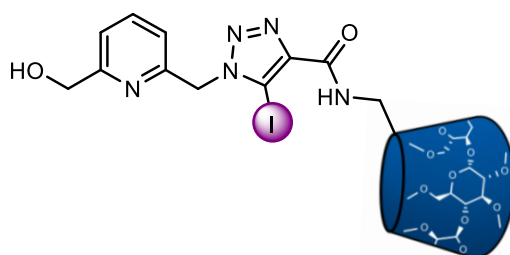

(6-(azidomethyl)pyridine-2-yl)methanol **2** (41 mg, 0.25 mmol) was dissolved in a 1:1 mixture of dry, degassed THF/CH<sub>3</sub>CN (2 mL) and the reaction vessel covered in foil. Sodium iodide (149 mg, 1.00 mmol) and copper(II) perchlorate hexahydrate (185 mg, 0.5 mmol) were added and the solution stirred for 5 minutes. Further added were DBU (37.3 μL, 0.25 mmol) and pmβCD alkyne **9** (366 mg, 0.25 mmol) and the mixture stirred at room temperature under a N<sub>2</sub> atmosphere overnight. The reaction mixture was diluted with CHCl<sub>3</sub> (25 mL) and washed with NH<sub>4</sub>OH<sub>(aq)</sub> (3 x 20 mL), brine (2 x 20 mL) and dried over MgSO<sub>4</sub>. After removal of the solvent *in vacuo*, purification by silica gel column chromatography (gradient from pure CHCl<sub>3</sub> to 3 % MeOH in CHCl<sub>3</sub>) afforded the arm precursor **10I** as a crystalline off-white solid (232 mg, 53 %). **<sup>1</sup>H NMR** (500 MHz, CDCl<sub>3</sub>) δ (ppm): 7.70 (1H, t, <sup>3</sup>J = 7.8 Hz, pyridine ArH), 7.47 (1H, t, <sup>3</sup>J = 5.8 Hz, amide NH), 7.23 (1H, d, <sup>3</sup>J = 7.8 Hz, pyridine ArH), 6.93 (1H, d, <sup>3</sup>J = 7.6 Hz, pyridine ArH), 5.79 (2H, ABquart., Δδ<sub>AB</sub> = 0.04, <sup>2</sup>J<sub>AB</sub> = 15.5 Hz, CH<sub>2</sub>-N iodotriazole), 5.12–5.23 (7H, m, β-CD H<sub>1</sub>), 4.74 (2H, d, <sup>3</sup>J = 4.9 Hz, CH<sub>2</sub>OH), 3.18–3.99 (103H, m, β-CD H<sub>2-6</sub> + CH<sub>3</sub>O + OH); **<sup>13</sup>C NMR** (125 MHz, CDCl<sub>3</sub>) δ (ppm): 159.6, 159.4, 152.4, 143.3, 137.9, 120.2, β-CD signals consistent with loss of C7 symmetry: (99.2–98.5; β-CD C<sub>1</sub>), 82.1–81.4, 80.4–79.9, 71.5–70.9, 70.1, 63.8, 61.6–61.3, 59.2–58.3, 55.1, 39.9; **HR-MS** (ESI +ve) *m/z*: 1778.64524 ([M + Na]<sup>+</sup>, C<sub>72</sub>H<sub>118</sub>O<sub>36</sub>N<sub>5</sub>INa calc. 1778.64934).

6<sup>A</sup>-amido-pm $\beta$ CD-appended XB 'chloro-arm' precursor, **11I**

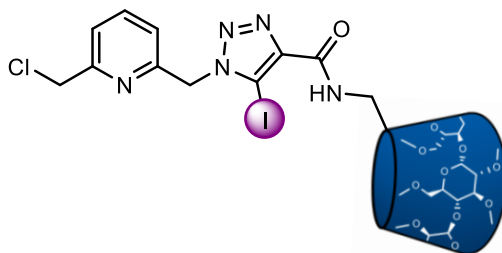

To a solution of **10I** (1.04 g, 0.59 mmol) in dry CH<sub>2</sub>Cl<sub>2</sub> (25 ml) at 0 °C, was slowly added SOCl<sub>2</sub> (0.13 ml, 1.77 mmol) and the reaction stirred at rt under a N<sub>2</sub> atmosphere for 6 hrs. The stirring mixture was carefully quenched and neutralised by the slow addition of a saturated Na<sub>2</sub>CO<sub>3(aq)</sub> solution at 0 °C resulting in vigorous gas evolution. Thereafter, the biphasic mixture was further diluted with CHCl<sub>3</sub> (25 ml) and washed with H<sub>2</sub>O (2 x 25 ml). The organic layer was dried over MgSO<sub>4</sub> and solvent removal *in vacuo* gave the chloro-arm **11I** as a cream-coloured powder in good purity which was used without further purification (809 mg, 77 %). **<sup>1</sup>H NMR** (500 MHz, CDCl<sub>3</sub>) δ (ppm): 7.72 (1H, t, <sup>3</sup>J = 7.8 Hz, pyridine ArH), 7.45–7.49 (2H, m, pyridine ArH + amide NH), 6.87 (1H, d, <sup>3</sup>J = 7.8 Hz, pyridine ArH), 5.78 (2H, ABquart., Δδ<sub>AB</sub> = 0.05, <sup>2</sup>J<sub>AB</sub> = 16.0 Hz, CH<sub>2</sub>-N iodotriazole), 5.12–5.23 (7H, m, β-CD H<sub>1</sub>), 4.64 (2H, s, CH<sub>2</sub>Cl), 3.18–4.01 (102H, m, β-CD H<sub>2-6</sub> + CH<sub>3</sub>O); **<sup>13</sup>C NMR** (125 MHz, CDCl<sub>3</sub>) δ (ppm): 159.4, 157.0, 153.3, 143.3, 138.2, 122.3, 120.5, β-CD signals consistent with loss of C7 symmetry: (99.2–98.6; β-CD C<sub>1</sub>), 82.2–81.7, 81.4, 80.4–80.0, 71.5 – 70.9, 70.1, 61.6 – 61.3, 59.2 – 58.3, 55.2, 46.2, 39.9; **HR-MS** (ESI +ve) *m/z*: 1796.61119 ([M + Na]<sup>+</sup>, C<sub>72</sub>H<sub>117</sub>O<sub>35</sub>N<sub>5</sub>ClNa calc. 1796.61545).

Tris(6<sup>A</sup>-amido-pm $\beta$ CD)-appended XB tripodal ligand, **12I**

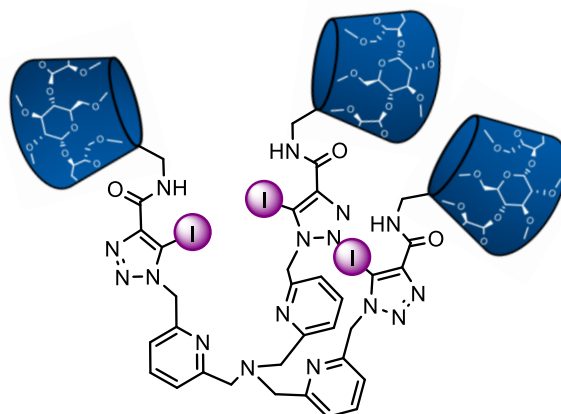

To a solution of **11I** (423 mg, 0.238 mmol) fully dissolved in dry CH<sub>3</sub>CN (20 mL) was added NH<sub>4</sub>OAc (550 mg, 7.14 mmol), Na<sub>2</sub>CO<sub>3</sub> (757 mg, 7.14 mmol) and KI (39.5 mg, 0.238 mmol) as solid portions. The reaction flask was completely sealed, and the mixture vigorously stirred for two days at room temperature after which no evidence of **11I** was observed by TLC or ESI-MS analyses. Thereafter, the creamy white suspension was directly transferred to a separating funnel and ca. 5-10 ml H<sub>2</sub>O very gently pipetted into the vessel. The cloudy, lower aqueous layer was separated, and the remaining clear pale yellow organic layer concentrated *in vacuo*. The resultant crude residue was redissolved in CHCl<sub>3</sub> (25 mL) and washed with brine (2 x 10 mL) and the organics dried over MgSO<sub>4</sub>. Solvent removal and purification by preparative thin layer chromatography (6 % MeOH in CH<sub>2</sub>Cl<sub>2</sub>) afforded the tripodal ligand **12I** as a crystalline off-white solid upon drying *in vacuo* (216 mg, 52 % yield). <sup>1</sup>H NMR (500 MHz, CDCl<sub>3</sub>)  $\delta$  (ppm): 7.66 (3H, t, <sup>3</sup>J = 7.7 Hz, pyridine ArH), 7.46–7.49 (6H, m, pyridine ArH + amide NH), 6.73 (3H, d, <sup>3</sup>J = 7.8 Hz, pyridine ArH), 5.77 (6H, ABquart.,  $\Delta\delta_{AB}$  = 0.05, <sup>2</sup>J<sub>AB</sub> = 16.1 Hz, CH<sub>2</sub>-N iodotriazole), 5.13–5.23 (21H, m,  $\beta$ -CD H<sub>1</sub>), 3.17–3.97 (312H, m,  $\beta$ -CD H<sub>2-6</sub> + CH<sub>3</sub>O + CH<sub>2</sub>-N tertiary amine); <sup>13</sup>C NMR (125 MHz, CDCl<sub>3</sub>)  $\delta$  (ppm): 159.5, 153.1, 143.3, 137.7, 122.3, 119.5,  $\beta$ -CD signals consistent with loss of C7 symmetry: (99.0–98.6;  $\beta$ -CD C<sub>1</sub>), 82.3–81.2, 80.4–79.9, 71.5–70.0, 61.5–61.4, 59.7–58.4, 55.5, 39.8; HR-MS (ESI +ve) *m/z*: 2627.98525 ([M + H + Na]<sup>2+</sup>, C<sub>216</sub>H<sub>352</sub>O<sub>105</sub>N<sub>16</sub>I<sub>3</sub>Na calc. 2627.98919).

### Tris(pm $\beta$ CD)-appended XB Cu(II) tripod, **13I**·2OTf

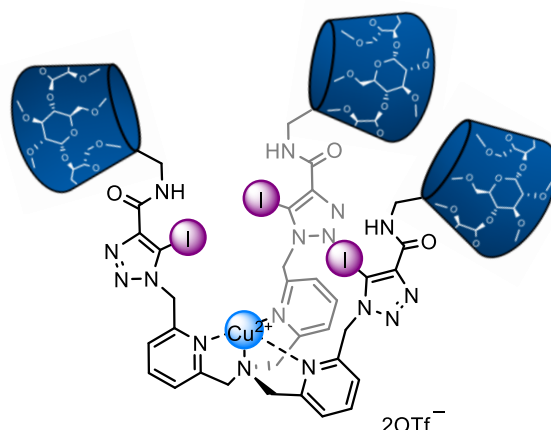

To tripod ligand **12I** (100 mg, 0.02 mmol) in a 1:1 mixture of CH<sub>2</sub>Cl<sub>2</sub>/MeOH (6 mL) was added copper(II) trifluoromethanesulfonate (7.23 mg, 0.02 mmol) and the solution stirred at room temperature under a N<sub>2</sub> atmosphere for 3 hours. After removal of the solvent *in vacuo*, the resultant deep blue residue was triturated with ice cold Et<sub>2</sub>O (ca. 5 mL). The ethereal layer was carefully decanted with a pipette and the contents of the flask dried under high vacuum to afford metallo-tripodal receptor **13I**·2OTf as a fine, pale blue crystalline powder (106 mg, quantitative). **UV-vis** (CH<sub>3</sub>CN/ H<sub>2</sub>O 6:4 v/v, 10 mM HEPES,  $\lambda_{max}$ / nm, ( $\epsilon$ / M<sup>-1</sup> cm<sup>-1</sup>)): 645 (182), 770 (119); **EPR** (CH<sub>3</sub>CN/ H<sub>2</sub>O 6:4 v/v, 10 mM HEPES, 105 K):  $g_{||} = 2.225$ ,  $g_{\perp} = 2.065$ ,  $A_{||1} = 185.0 \times 10^{-4}$  cm<sup>-1</sup>,  $A_{||2} = 220.0 \times 10^{-4}$  cm<sup>-1</sup>; **HR-MS** (ESI +ve)  $m/z$ : 2647.46450 ([M - 2OTf]<sup>2+</sup>, C<sub>216</sub>H<sub>351</sub>N<sub>16</sub>O<sub>105</sub>I<sub>3</sub><sup>63</sup>Cu calc. 2647.45519).

### Tetrabutylammonium salt of pinacolyl methylphosphonic acid, **TBA PMP**

To a chilled solution of 1.0 eqv of a methanolic solution of tetrabutylammonium (TBA) hydroxide at 0 °C directly was added 1.0 eqv of neutral pinacolyl methylphosphonic acid over 5 minutes. The resulting reaction mixture was allowed to warm to room temperature and stirred for 3 hours. The appropriate TBA pinacolyl methyl phosphonate salt was obtained by removal of the solvent *in vacuo* and leaving the salt to dry under high vacuum for at least 5 days. The resultant salt was obtained a white powder and stored in a vacuum desiccator with P<sub>2</sub>O<sub>5</sub> desiccant at room temperature.

### S3. Characterisation Data

#### S3.1 $^1\text{H}$ , $^{13}\text{C}$ NMR and HR-MS of all novel compounds

##### 2,5,8,11-tetraoxatetradec-13-yne, **3**

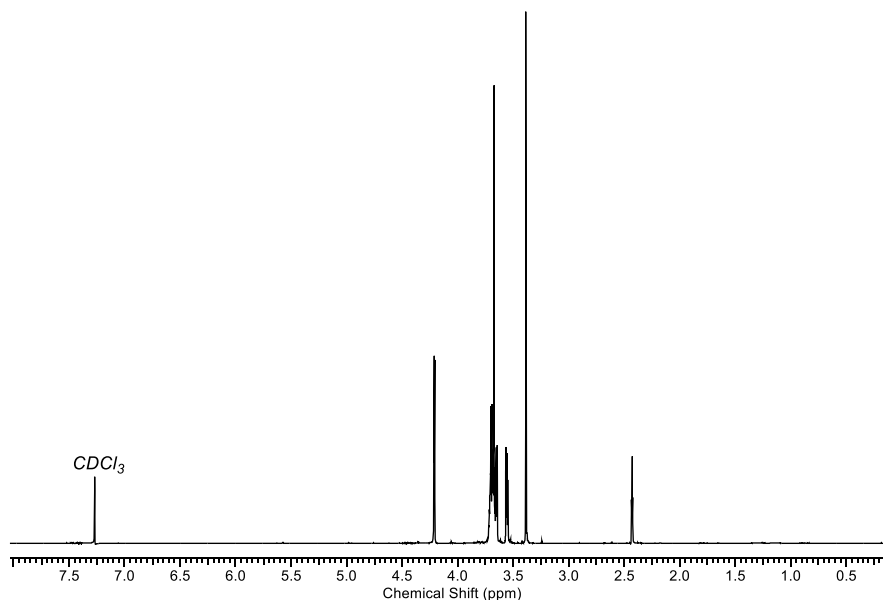

**Figure S2.**  $^1\text{H}$  NMR of alkyne **3** in  $\text{CDCl}_3$  (500 MHz,  $T = 298$  K).

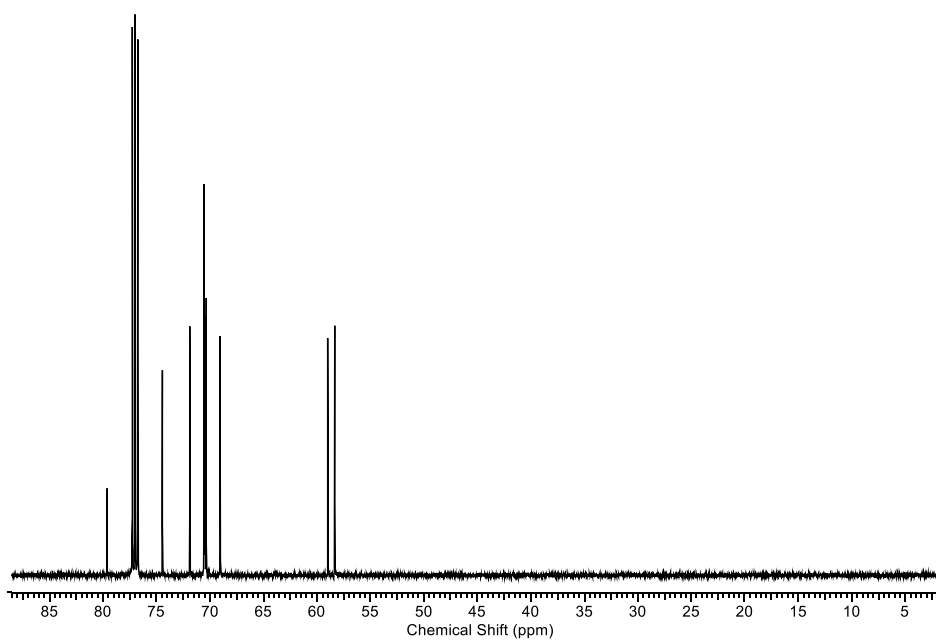

**Figure S3.**  $^{13}\text{C}$  NMR of alkyne **3** in  $\text{CDCl}_3$  (125 MHz,  $T = 298$  K).

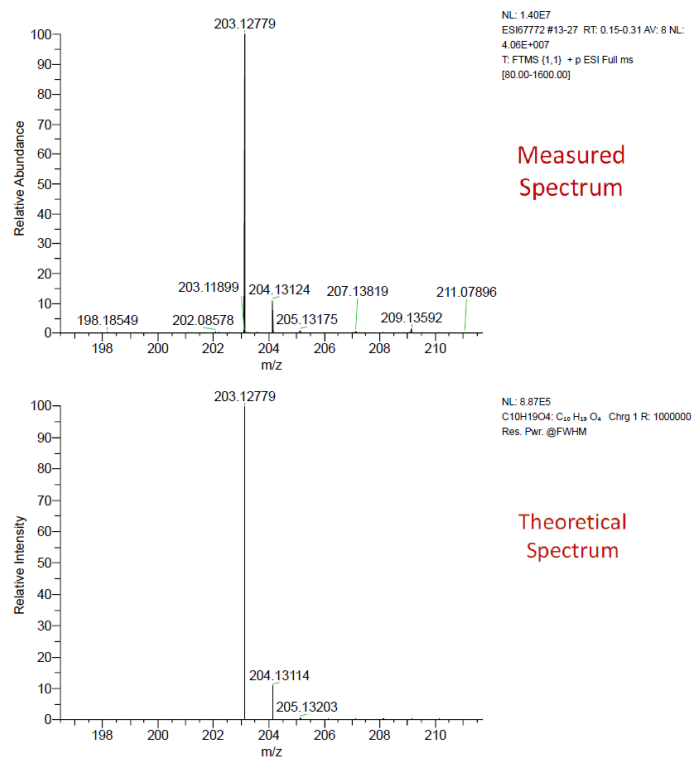

**Figure S4.** High-resolution mass spectrum of alkyne **3**.

**TEG-appended HB 'hydroxy-arm' precursor, 4H**

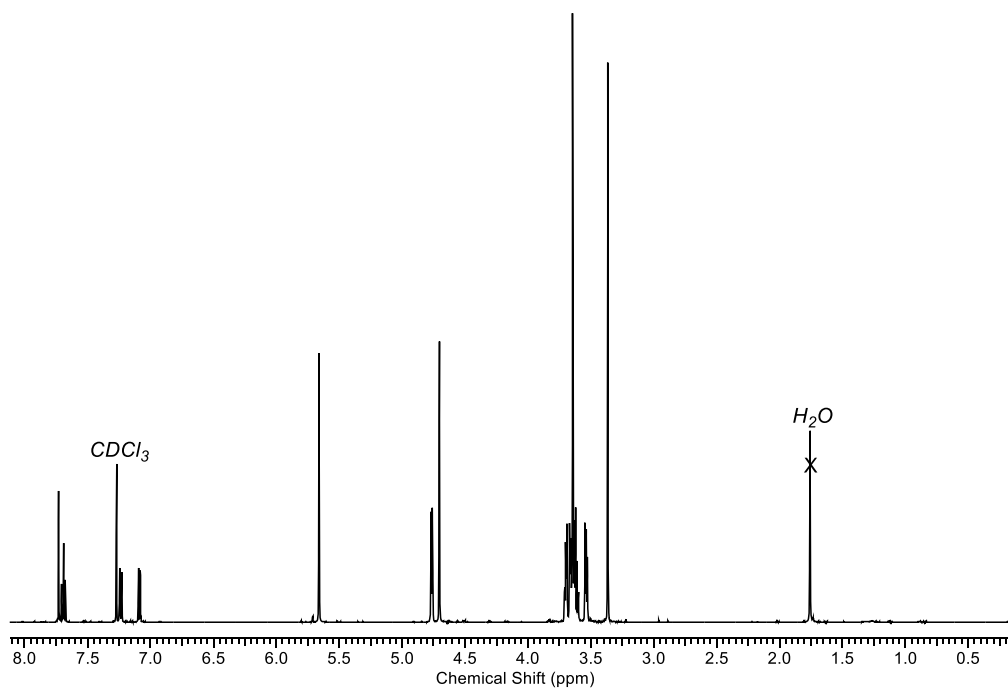

**Figure S5.** <sup>1</sup>H NMR of precursor **4H** in CDCl<sub>3</sub> (500 MHz, *T* = 298 K).



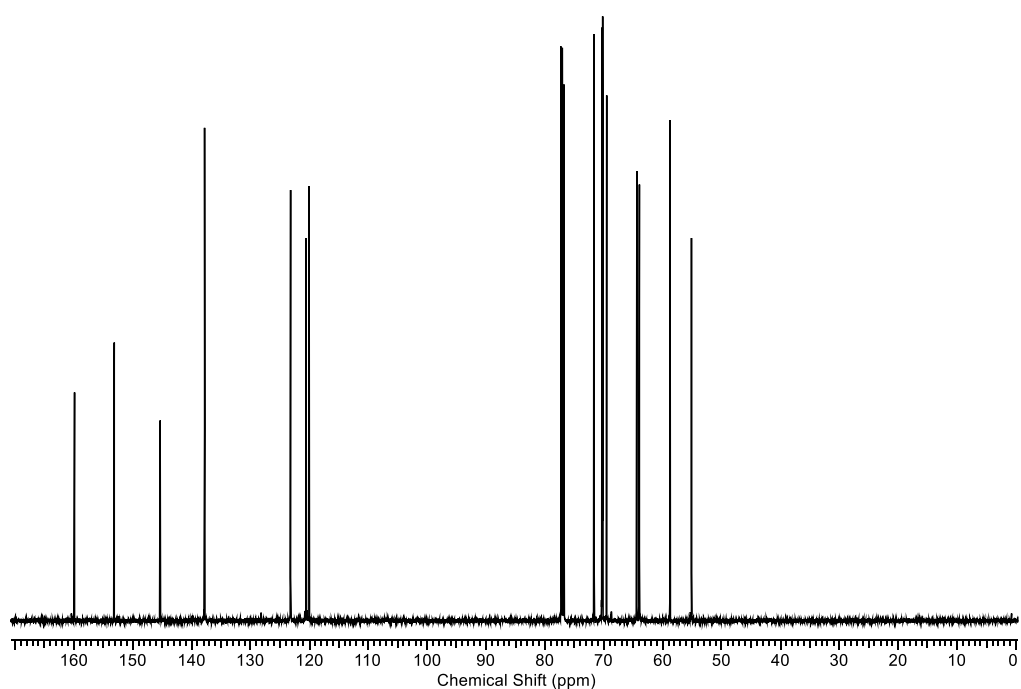

**Figure S6.**  $^{13}\text{C}$  NMR of precursor **4H** in  $\text{CDCl}_3$  (125 MHz,  $T = 298$  K).

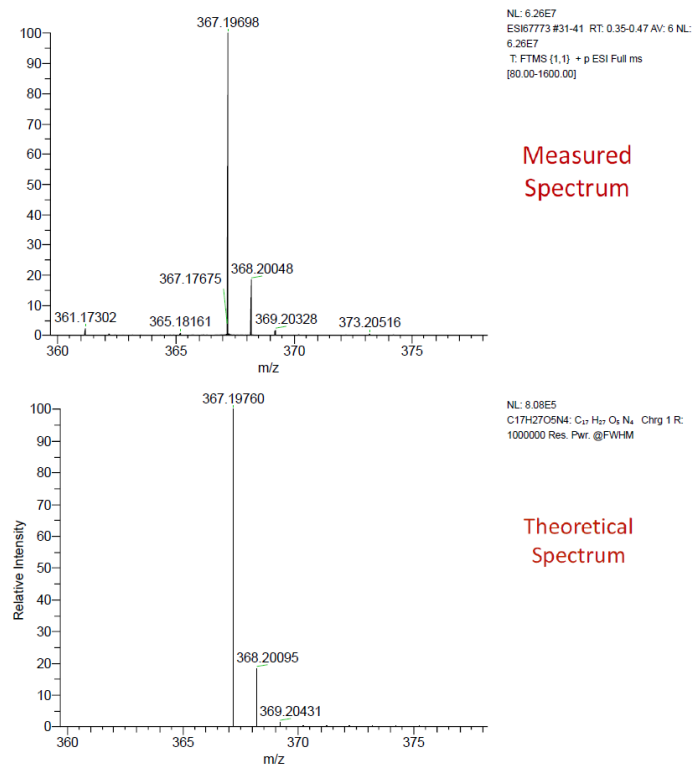

**Figure S7.** High-resolution mass spectrum of precursor **4H**.

TEG-appended XB 'hydroxy-arm' precursor, **4I**

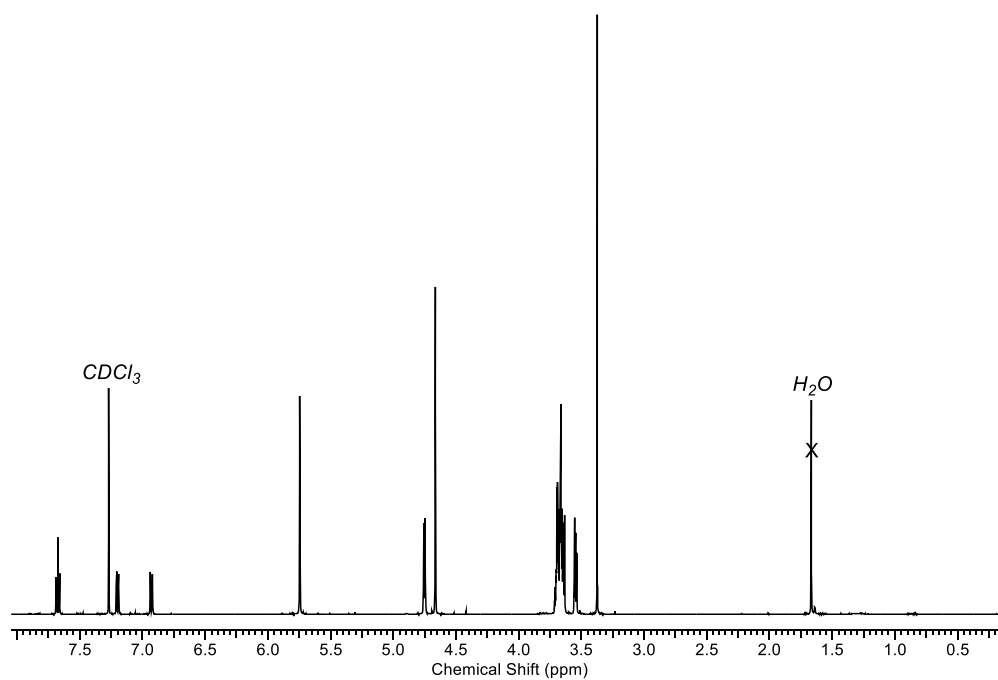

**Figure S8.**  $^1\text{H}$  NMR of precursor **4I** in  $\text{CDCl}_3$  (500 MHz,  $T = 298$  K).

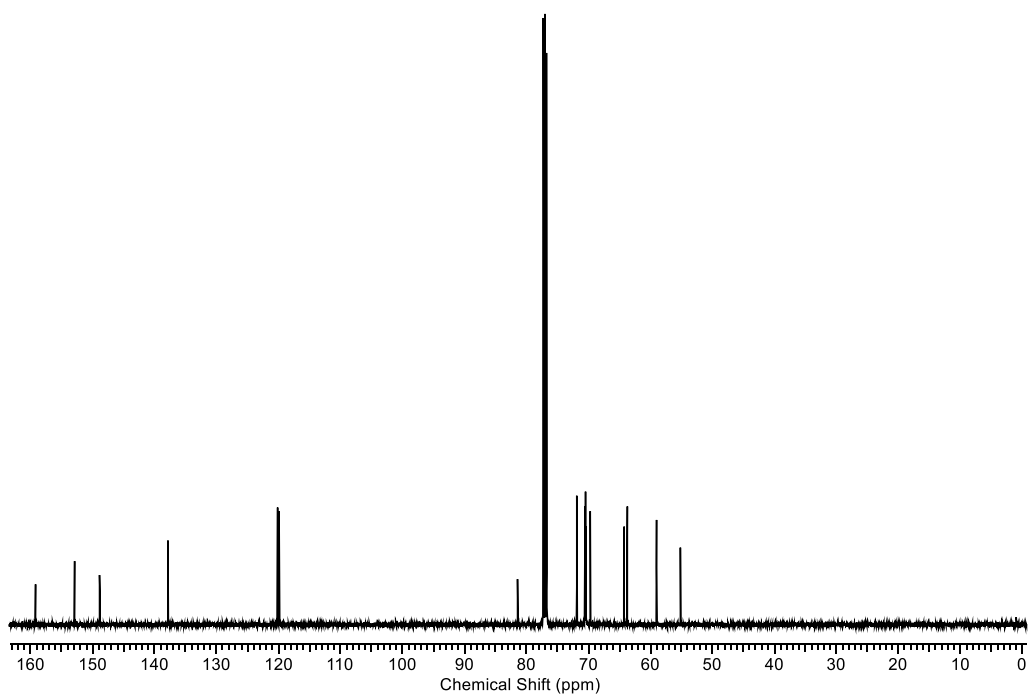

**Figure S9.**  $^{13}\text{C}$  NMR of precursor **4I** in  $\text{CDCl}_3$  (125 MHz,  $T = 298$  K).

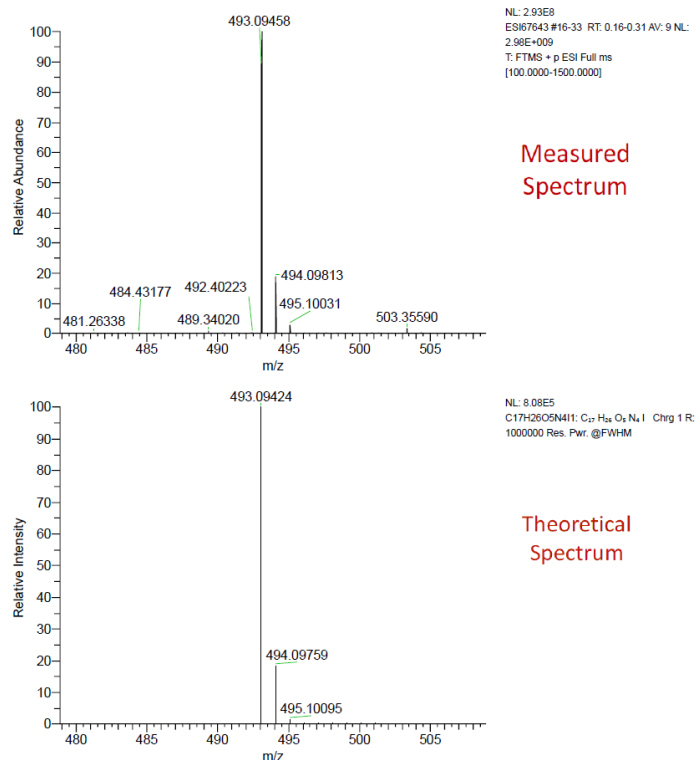

**Figure S10.** High-resolution mass spectrum of precursor **4I**.

**TEG-appended HB 'chloro-arm' precursor, 5H**

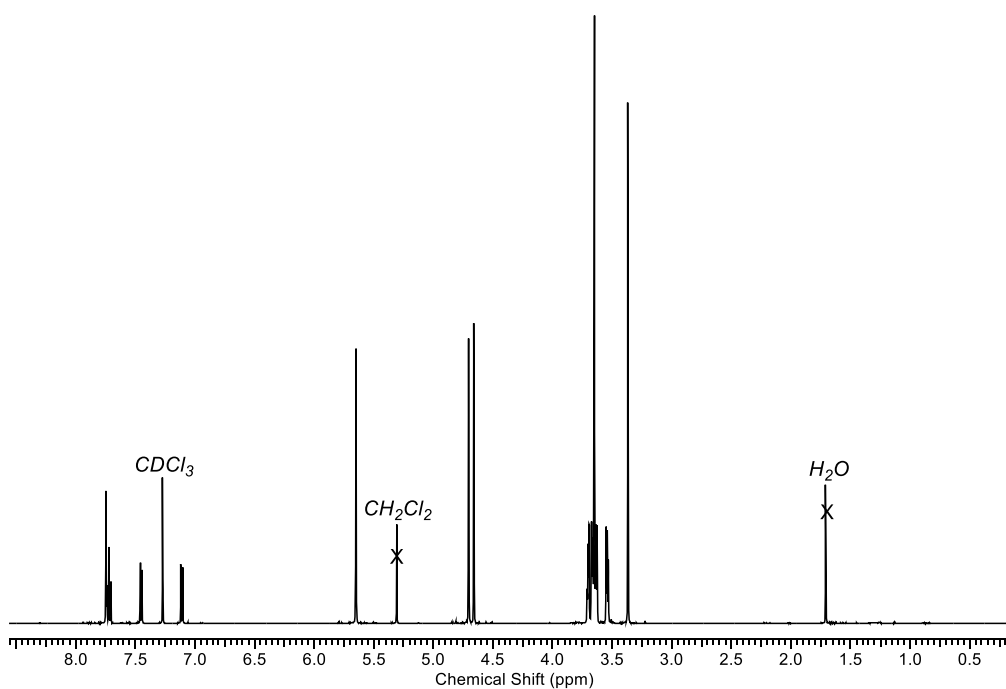

**Figure S11.**  $^1H$  NMR of precursor **5H** in  $CDCl_3$  (500 MHz,  $T = 298$  K).

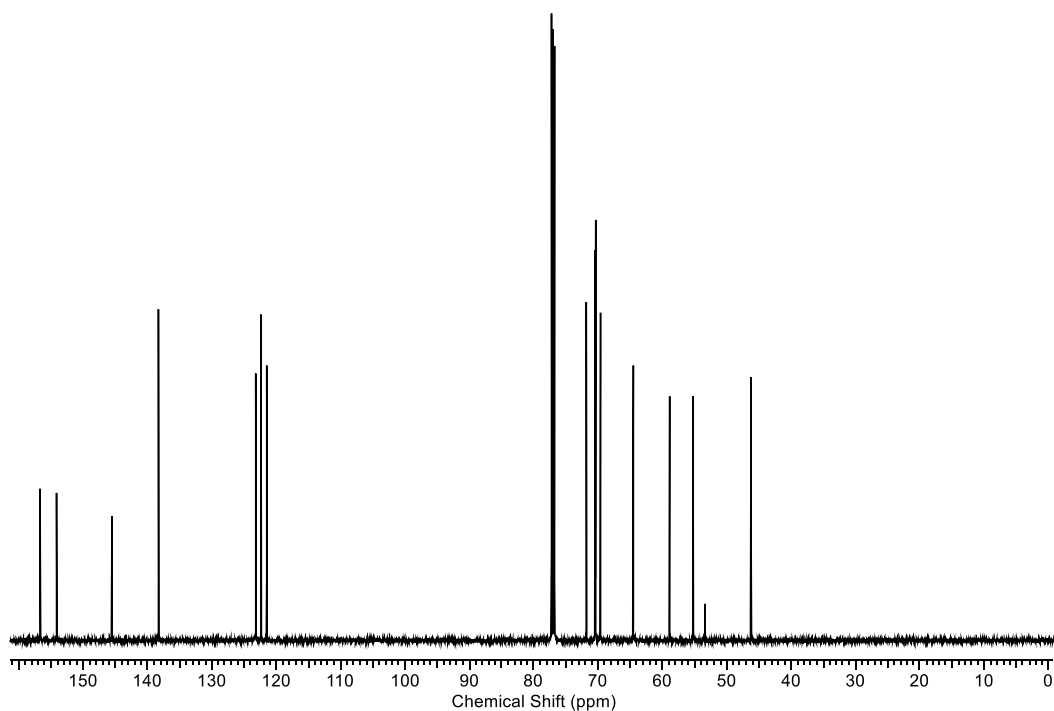

**Figure S12.**  $^{13}\text{C}$  NMR of precursor **5H** in  $\text{CDCl}_3$  (125 MHz,  $T = 298$  K).

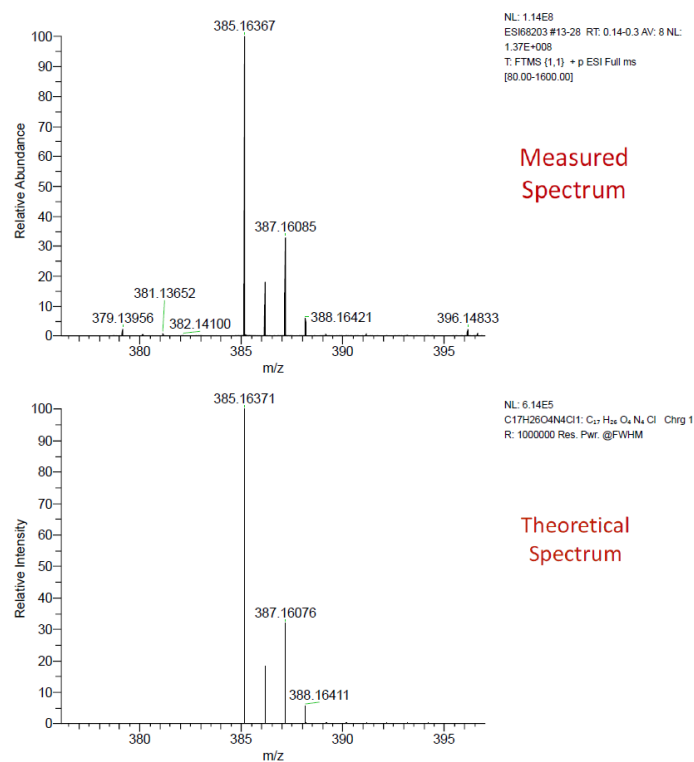

**Figure S13.** High-resolution mass spectrum of precursor **5H**.

TEG-appended XB 'chloro-arm' precursor, **5I**

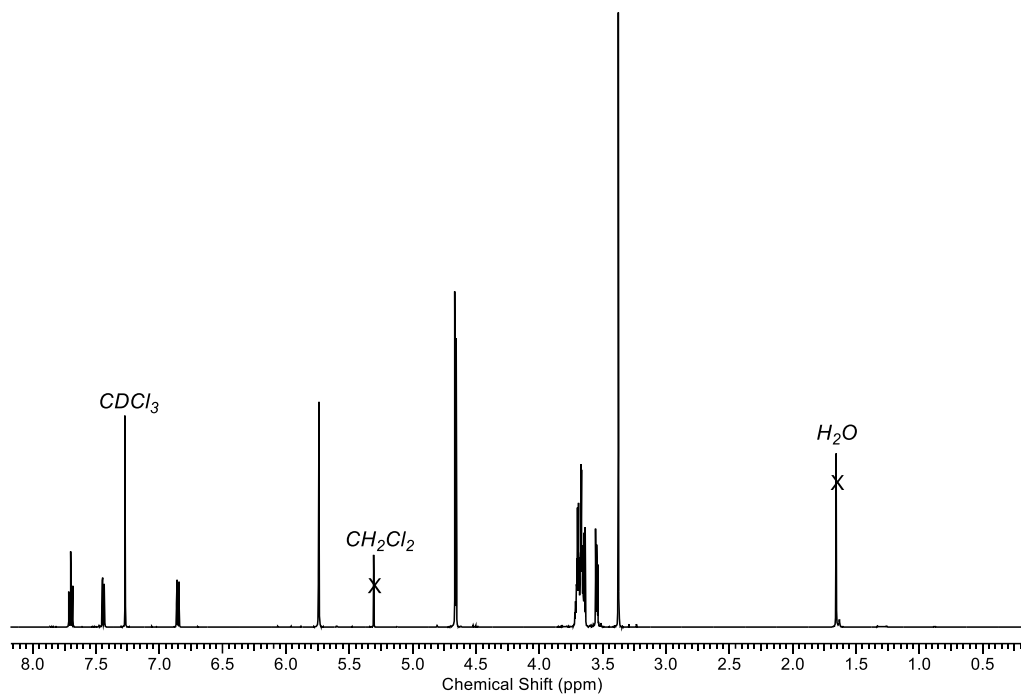

**Figure S14.**  $^1\text{H}$  NMR of precursor **5I** in  $\text{CDCl}_3$  (500 MHz,  $T = 298$  K).

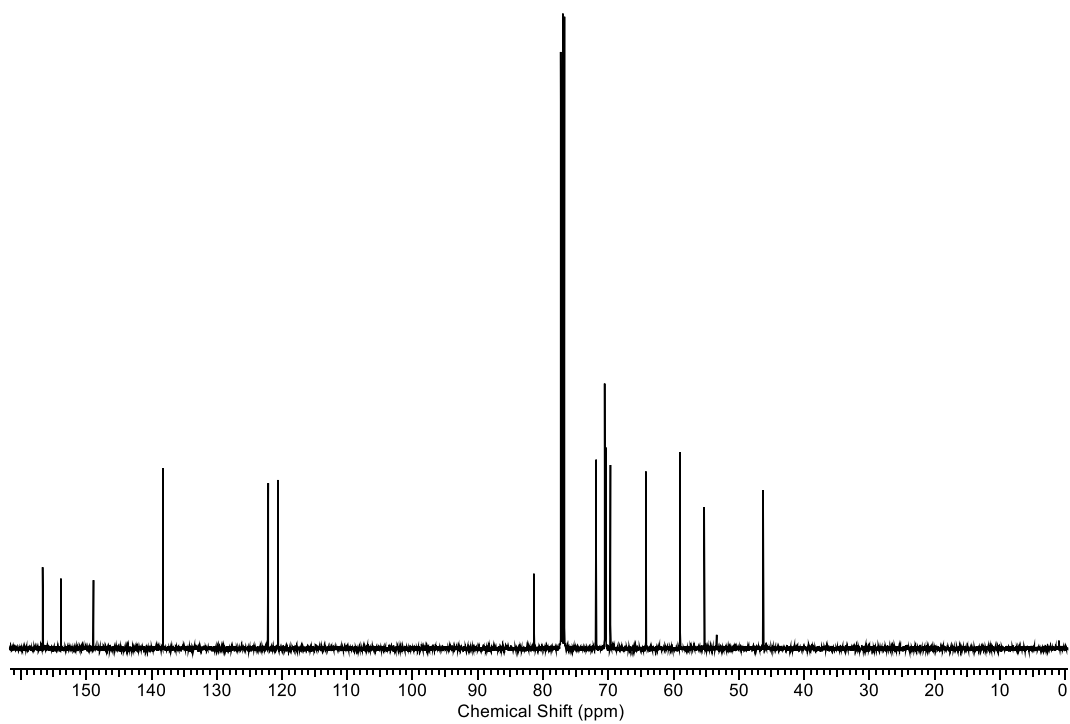

**Figure S15.**  $^{13}\text{C}$  NMR of precursor **5I** in  $\text{CDCl}_3$  (125 MHz,  $T = 298$  K).

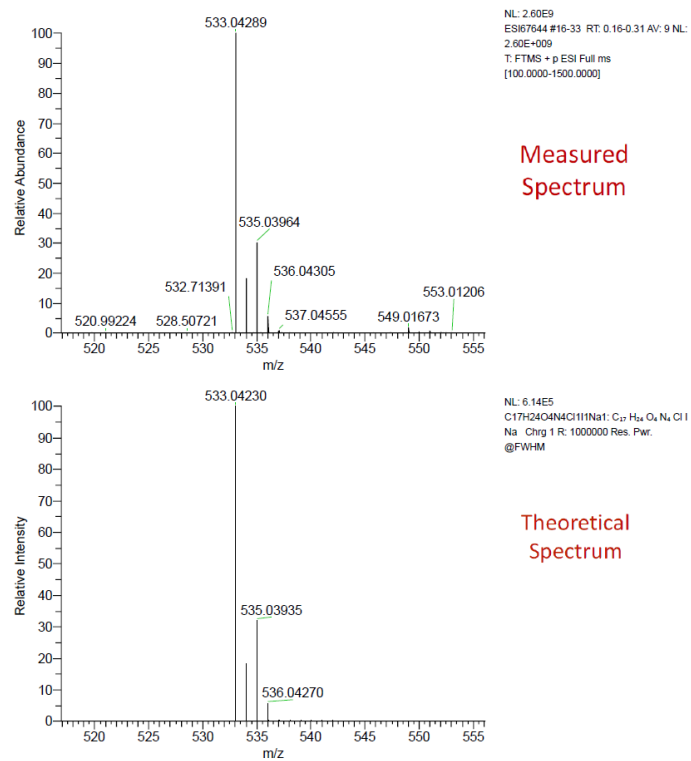

**Figure S16.** High-resolution mass spectrum of precursor **5I**.

**Tripodal HB ligand, 6H**

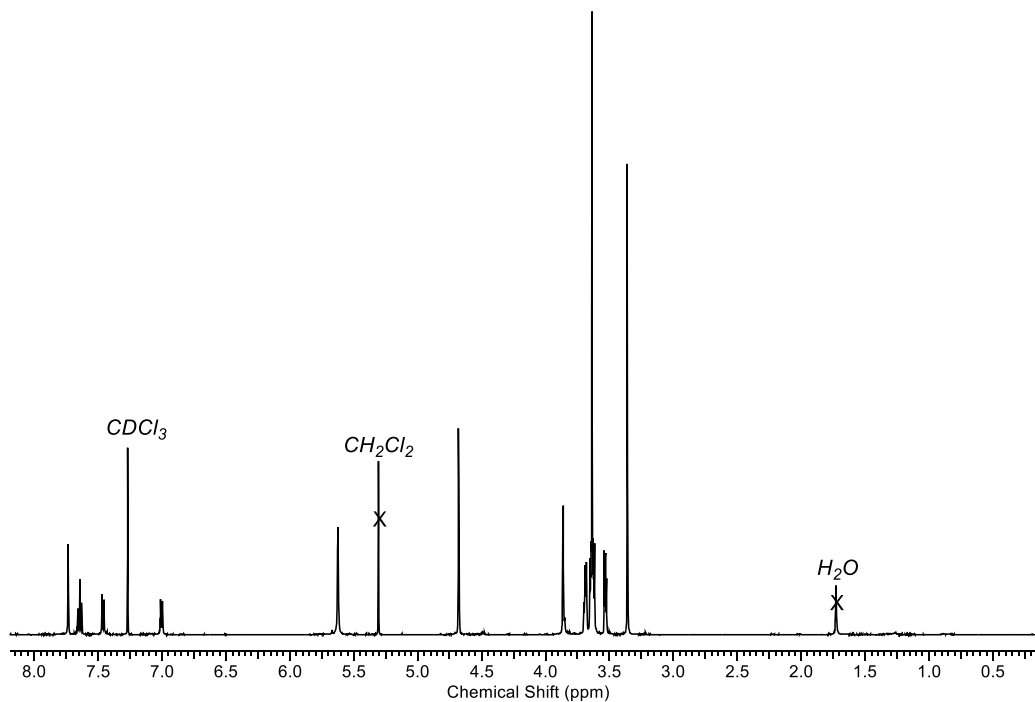

**Figure S17.**  $^1\text{H}$  NMR of ligand **6H** in  $\text{CDCl}_3$  (500 MHz,  $T = 298$  K).

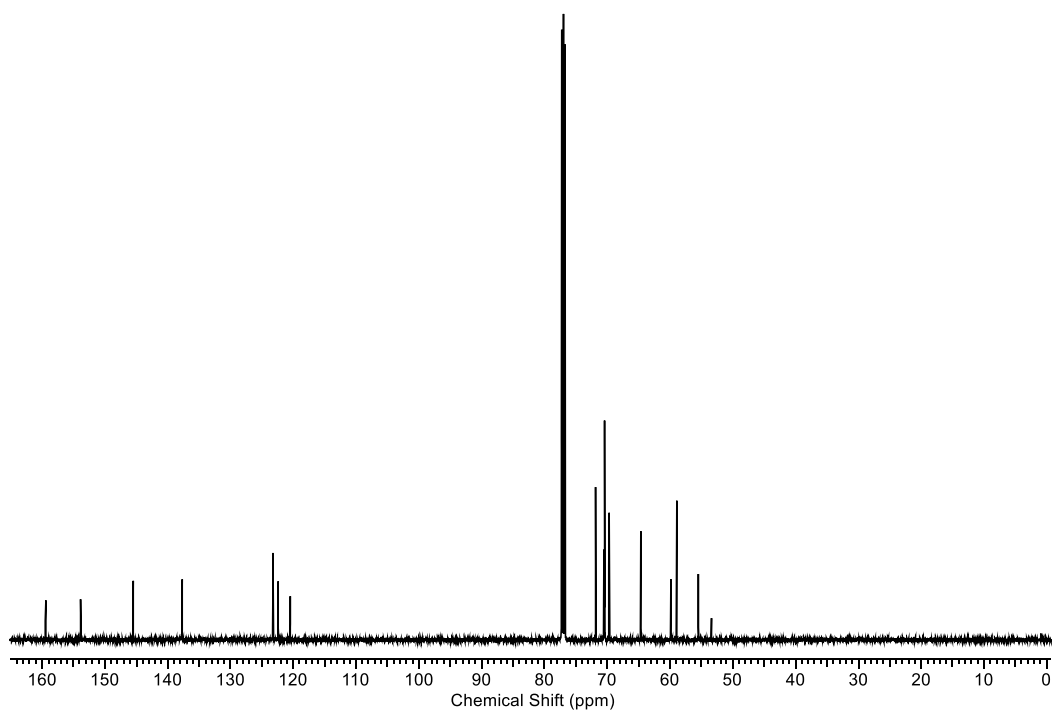

**Figure S18.**  $^{13}\text{C}$  NMR of ligand **6H** in  $\text{CDCl}_3$  (125 MHz,  $T = 298$  K).

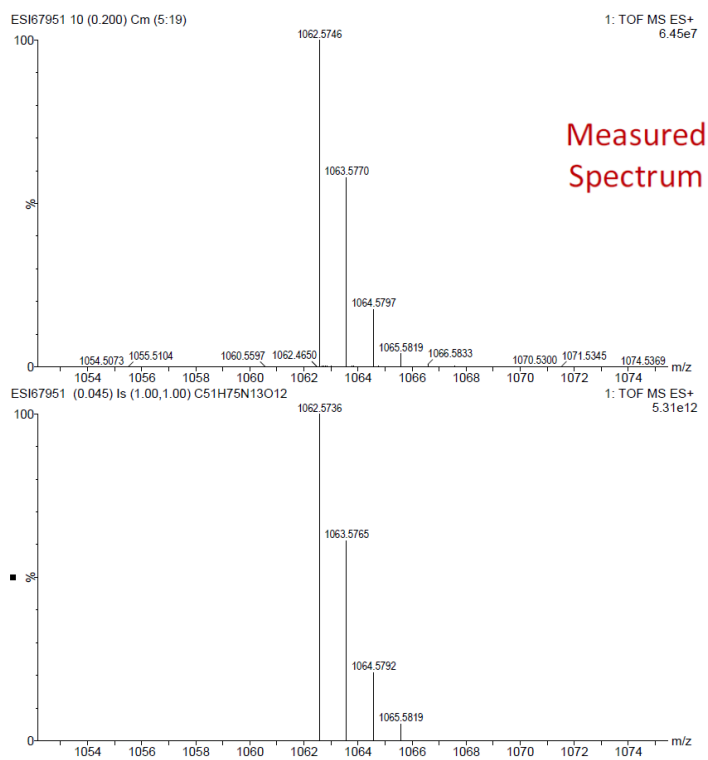

**Figure S19.** High-resolution mass spectrum of ligand **6H**.

**Tripodal XB ligand, 6I**

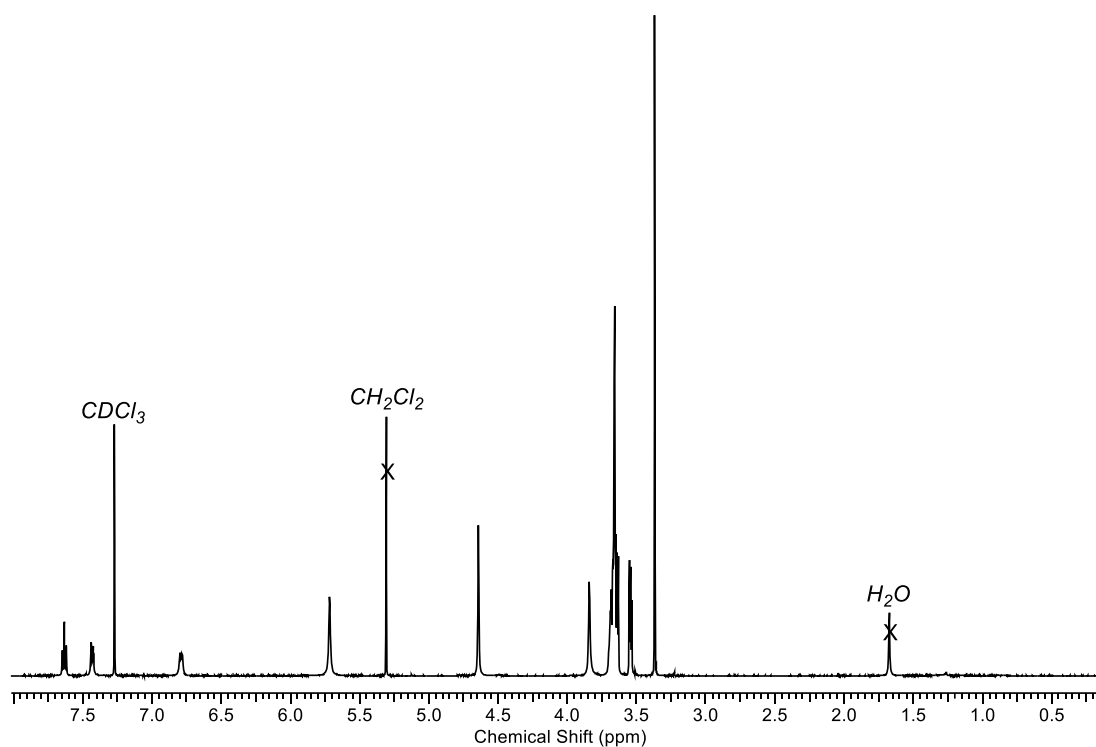

**Figure S20.**  $^1\text{H}$  NMR of ligand **6I** in  $\text{CDCl}_3$  (500 MHz,  $T = 298$  K).

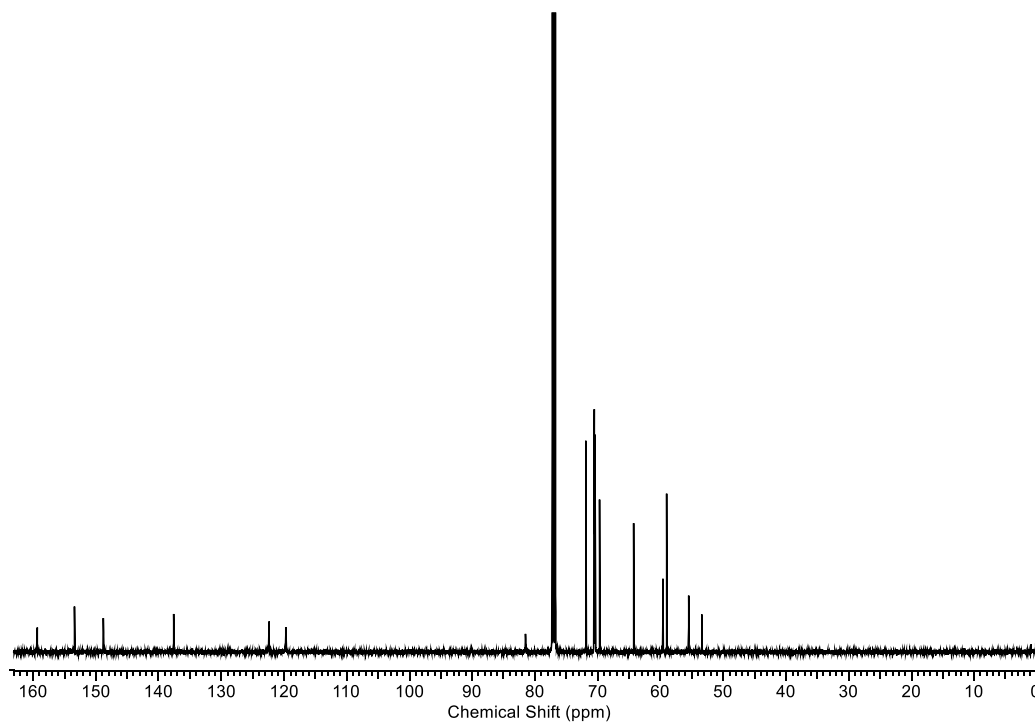

**Figure S21.**  $^{13}\text{C}$  NMR of ligand **6I** in  $\text{CDCl}_3$  (125 MHz,  $T = 298$  K).



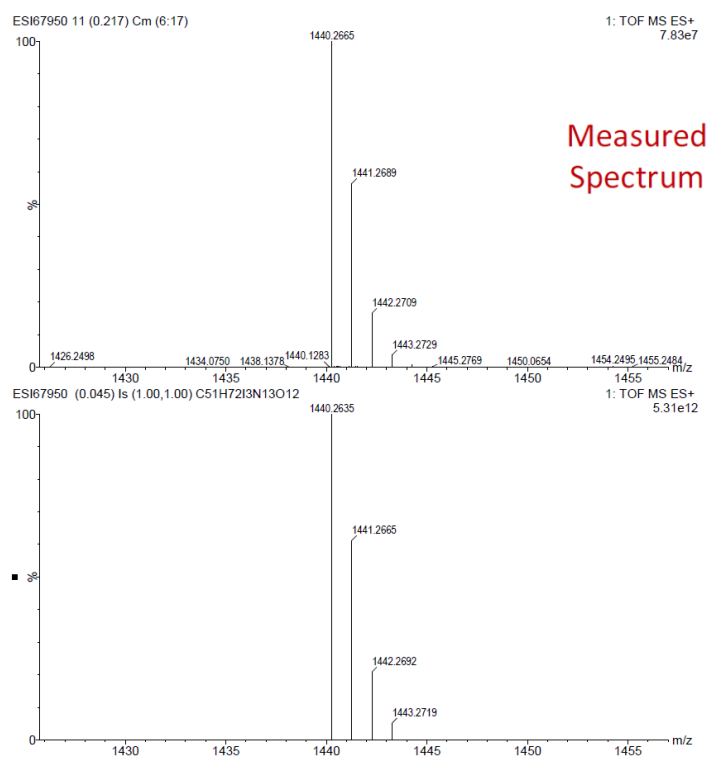

**Figure S22.** High-resolution mass spectrum of ligand **6I**.

**Succinimidyl-3-propiolate, 7**

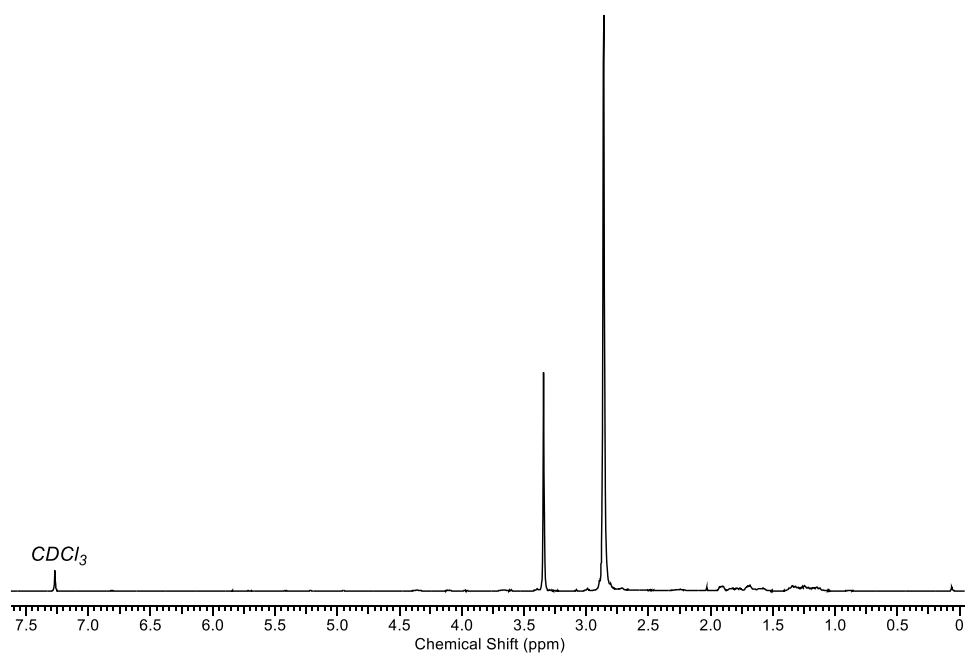

**Figure S23.**  $^1H$  NMR of precursor **7** in  $CDCl_3$  (500 MHz,  $T = 298$  K).

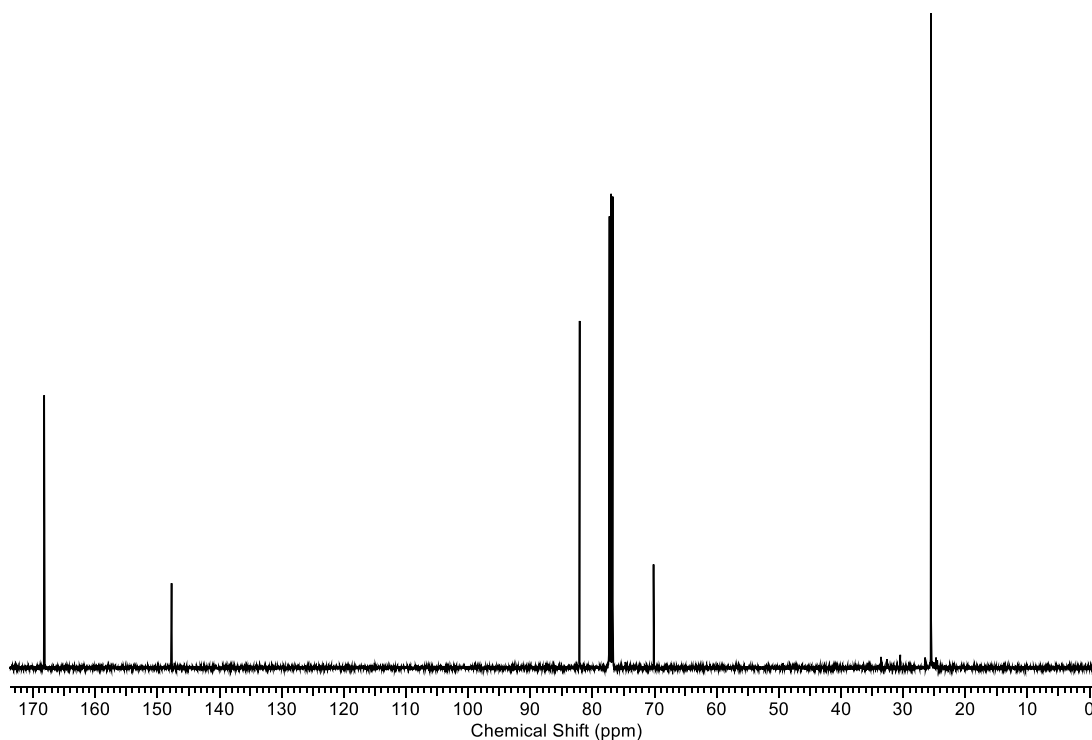

**Figure S24.**  $^{13}\text{C}$  NMR of precursor **7** in  $\text{CDCl}_3$  (125 MHz,  $T = 298$  K).

**6<sup>A</sup>-amido-pm $\beta$ CD alkyne, **9****

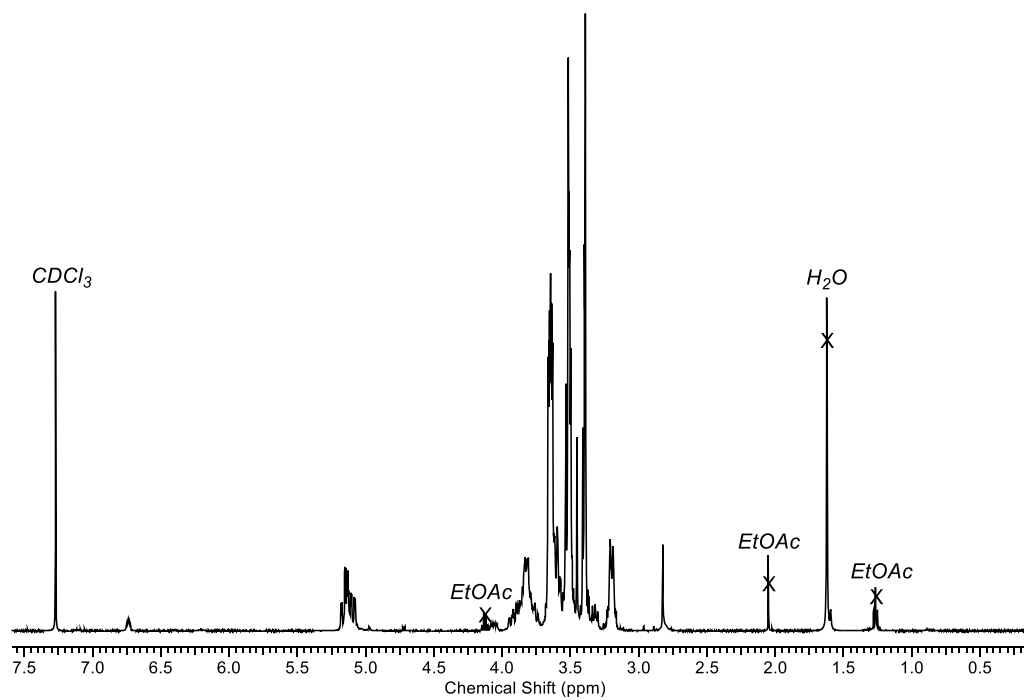

**Figure S25.**  $^1\text{H}$  NMR of alkyne **9** in  $\text{CDCl}_3$  (500 MHz,  $T = 298$  K).

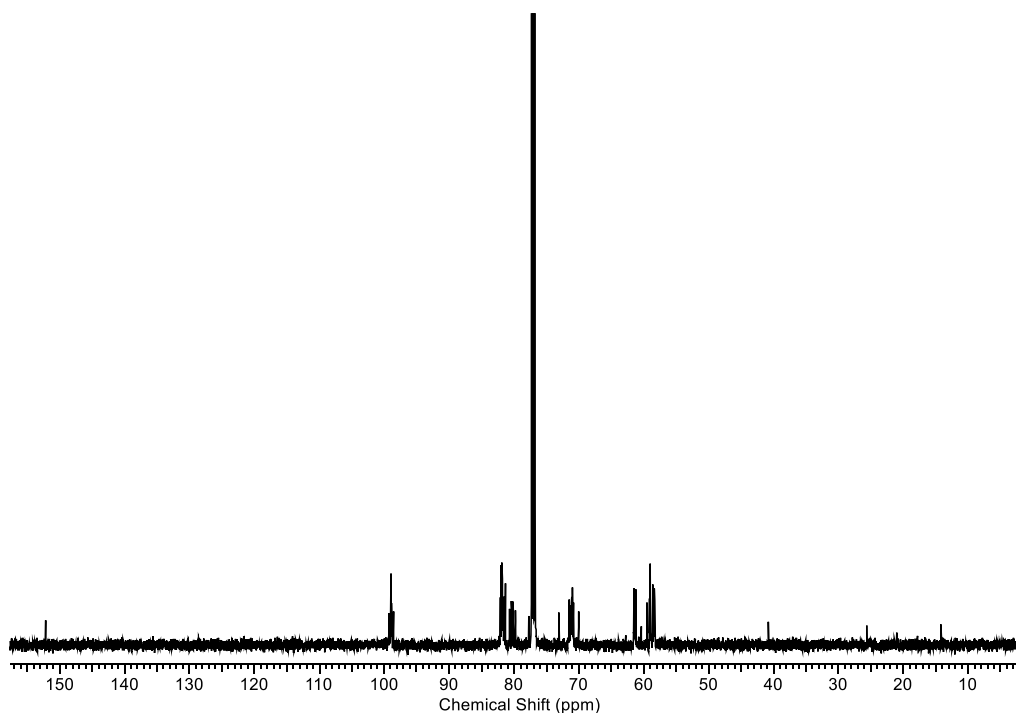

**Figure S26.**  $^{13}\text{C}$  NMR of alkyne **9** in  $\text{CDCl}_3$  (125 MHz,  $T = 298$  K).

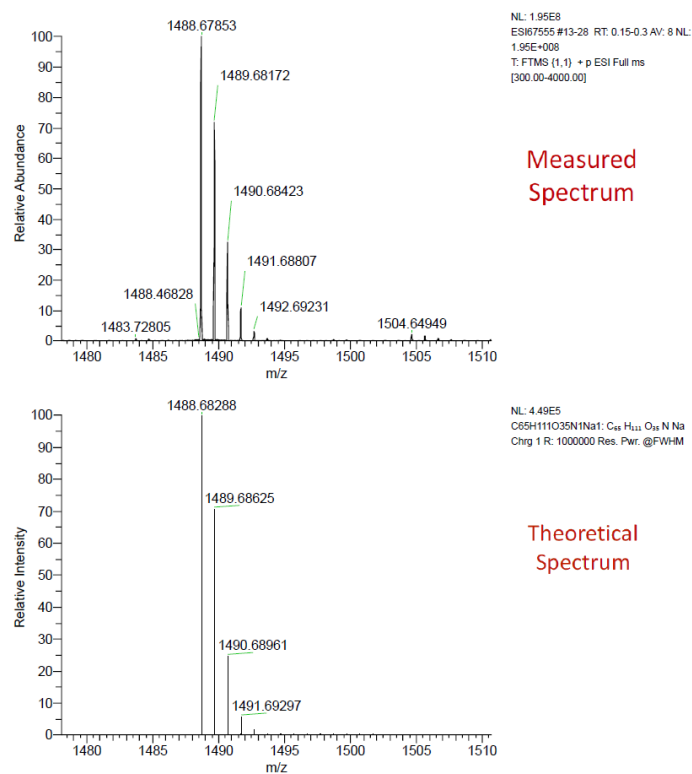

**Figure S27.** High-resolution mass spectrum of alkyne **9**.

**6<sup>A</sup>-amido-pm $\beta$ CD-appended XB 'hydroxy-arm' precursor, 10I**

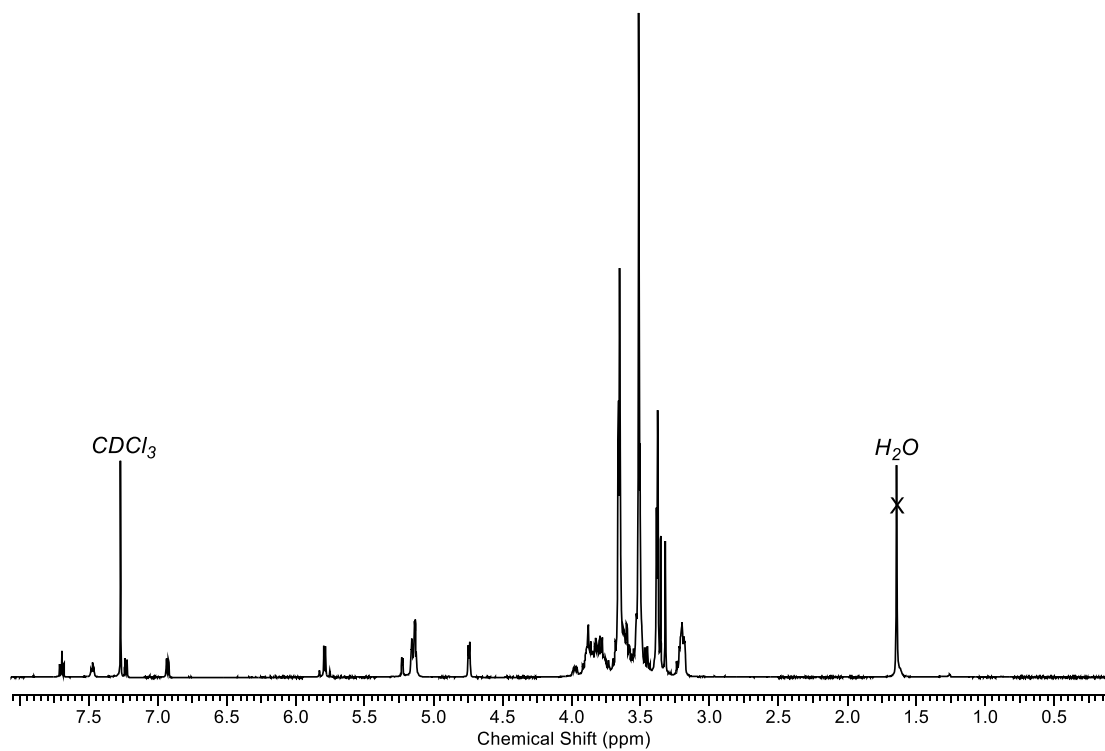

**Figure S28.** <sup>1</sup>H NMR of precursor **10I** in CDCl<sub>3</sub> (500 MHz, *T* = 298 K).

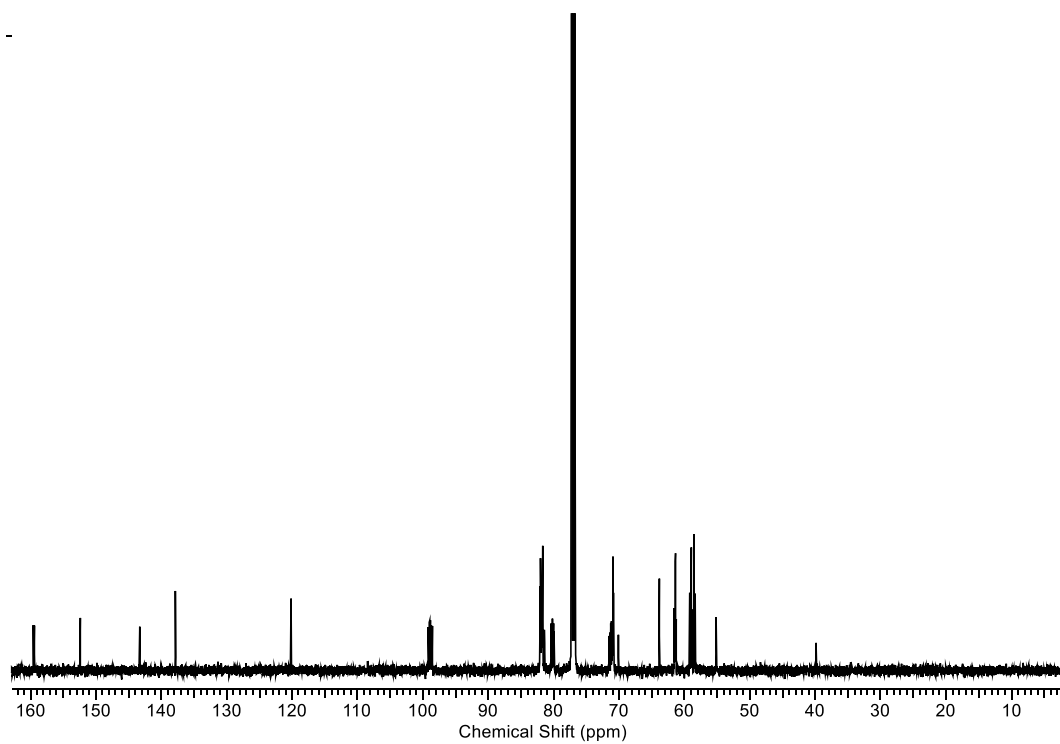

**Figure S29.** <sup>13</sup>C NMR of precursor **10I** in CDCl<sub>3</sub> (125 MHz, *T* = 298 K).

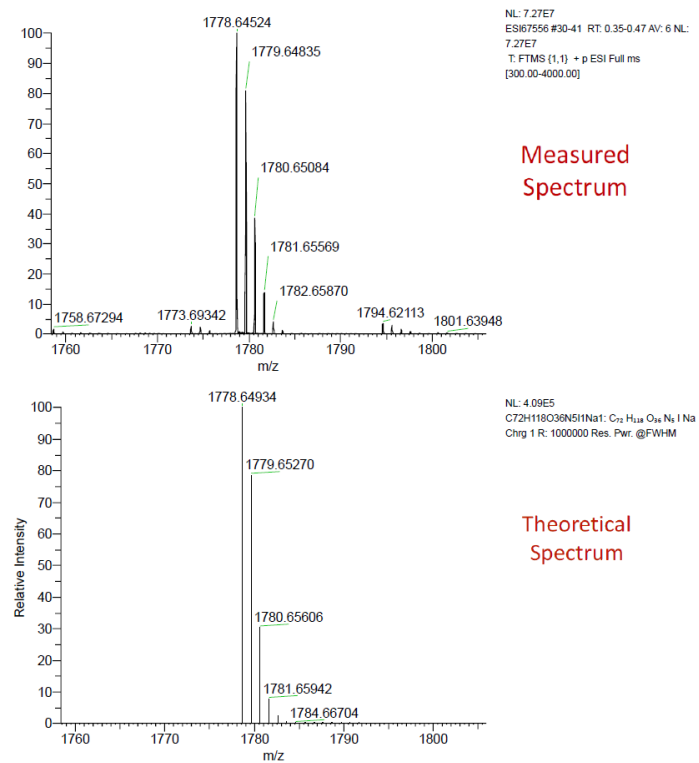

**Figure S30.** High-resolution mass spectrum of precursor **10I**.

**6<sup>A</sup>-amido-pm $\beta$ CD-appended XB 'chloro-arm' precursor, **11I****

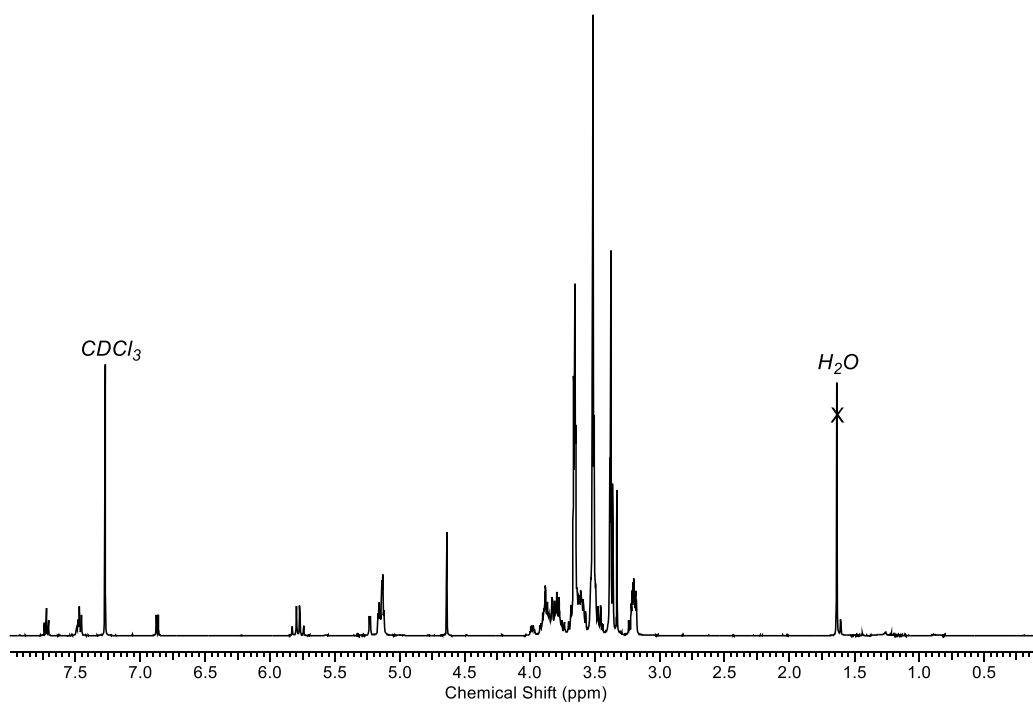

**Figure S31.** <sup>1</sup>H NMR of precursor **11I** in  $CDCl_3$  (500 MHz,  $T = 298$  K).

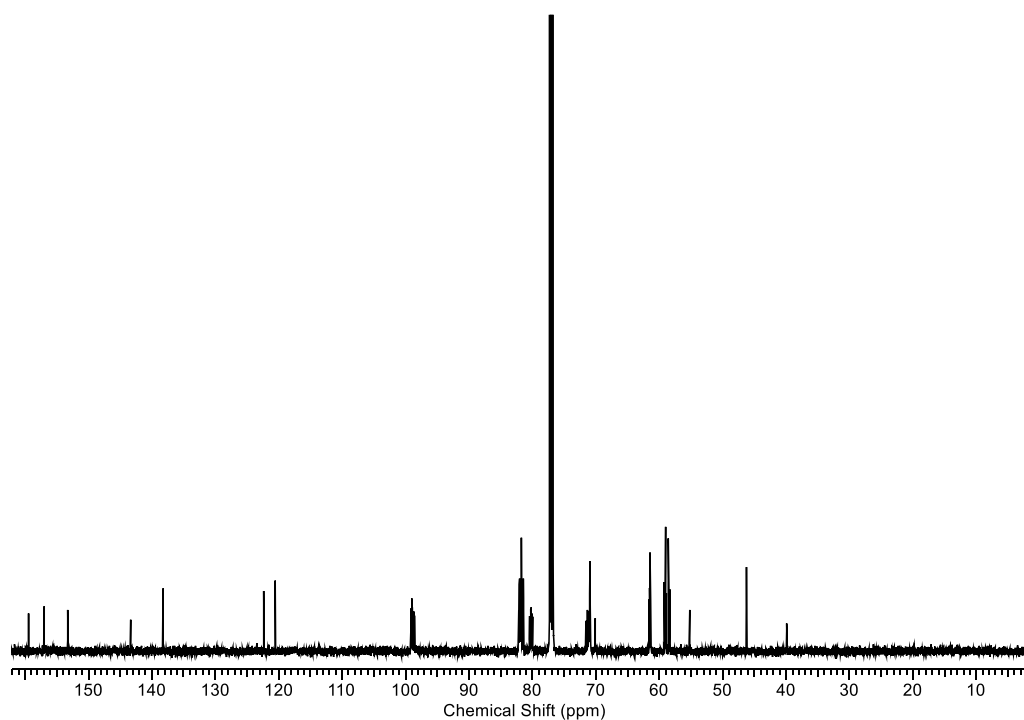

**Figure S32.**  $^{13}\text{C}$  NMR of precursor **11I** in  $\text{CDCl}_3$  (125 MHz,  $T = 298$  K).

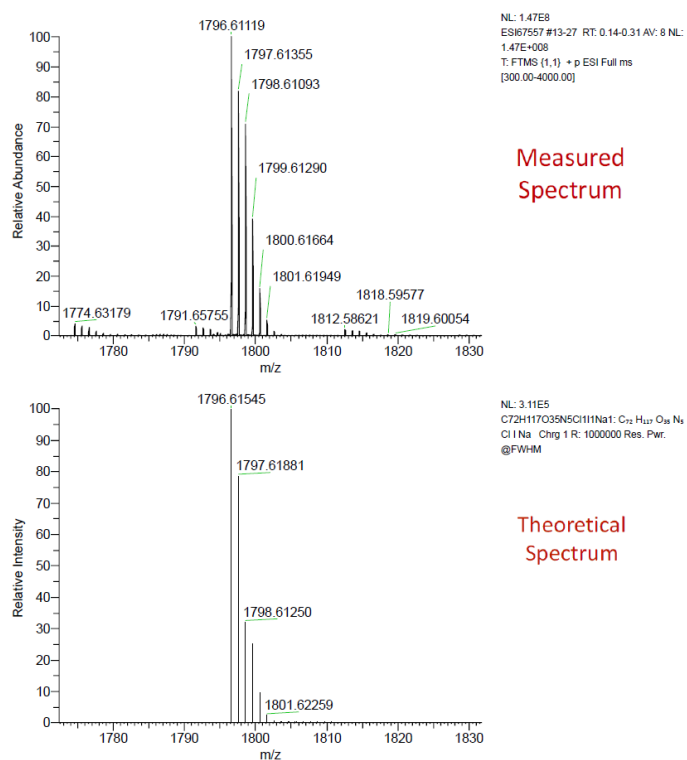

**Figure S33.** High-resolution mass spectrum of precursor **11I**.

Tris(pm $\beta$ CD)-appended XB tripodal ligand, **12I**

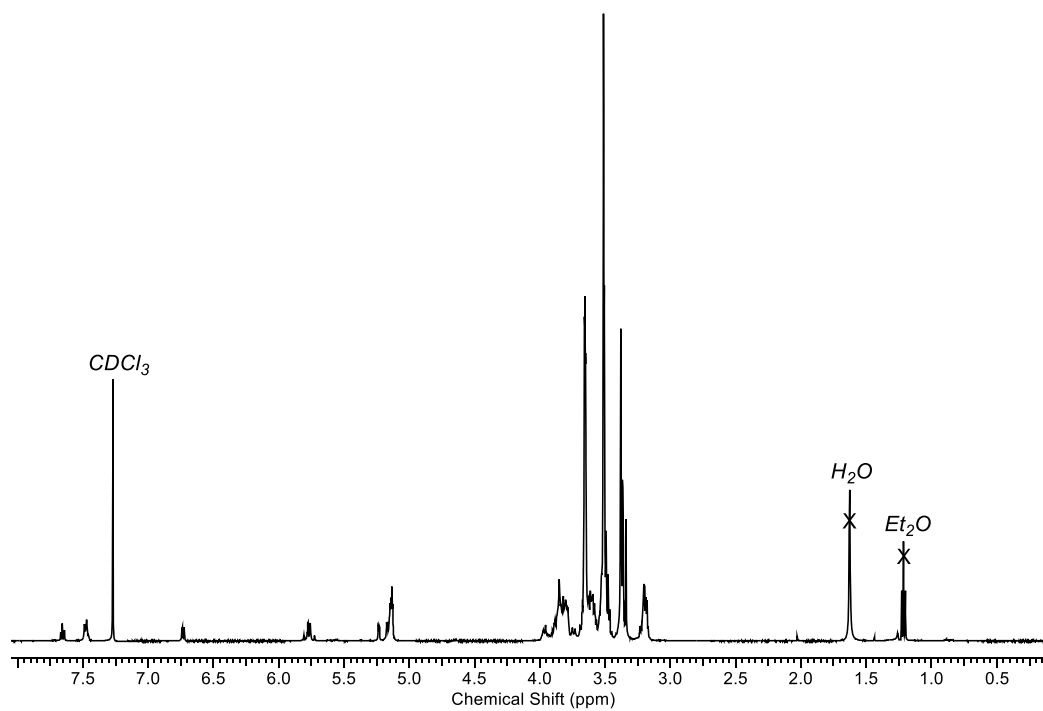

**Figure S34.**  $^1\text{H}$  NMR of ligand **12I** in  $\text{CDCl}_3$  (500 MHz,  $T = 298$  K).

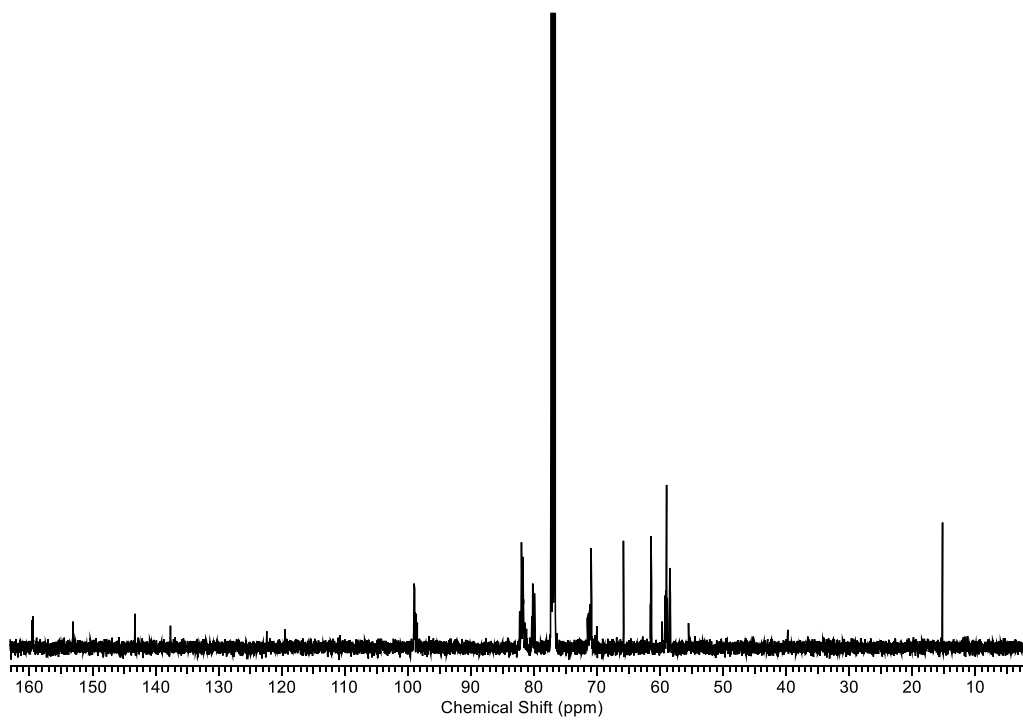

**Figure S35.**  $^{13}\text{C}$  NMR of ligand **12I** in  $\text{CDCl}_3$  (125 MHz,  $T = 298$  K).

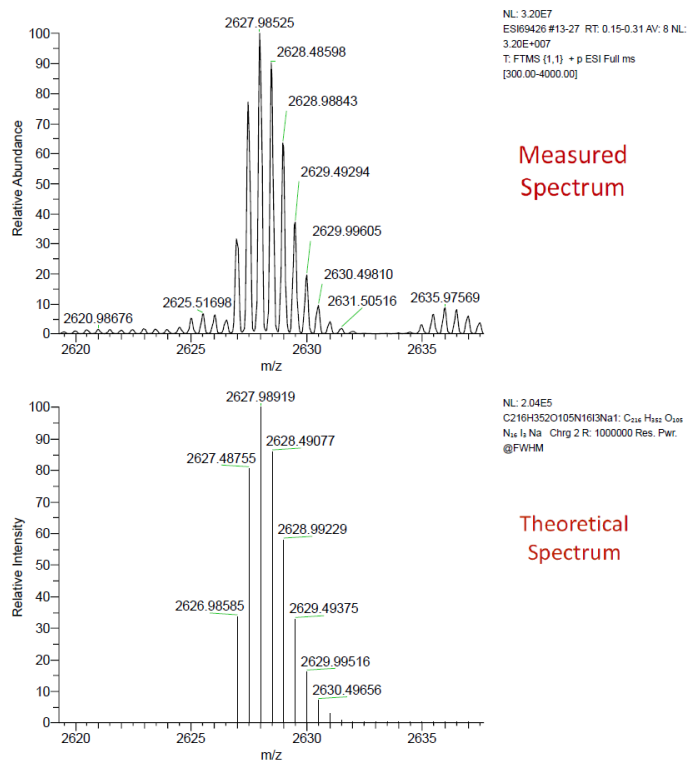

**Figure S36.** High-resolution mass spectrum of ligand **12I**.



### S3.2 Further comparative $^1\text{H}$ NMR spectra of tripodal XB ligand formation

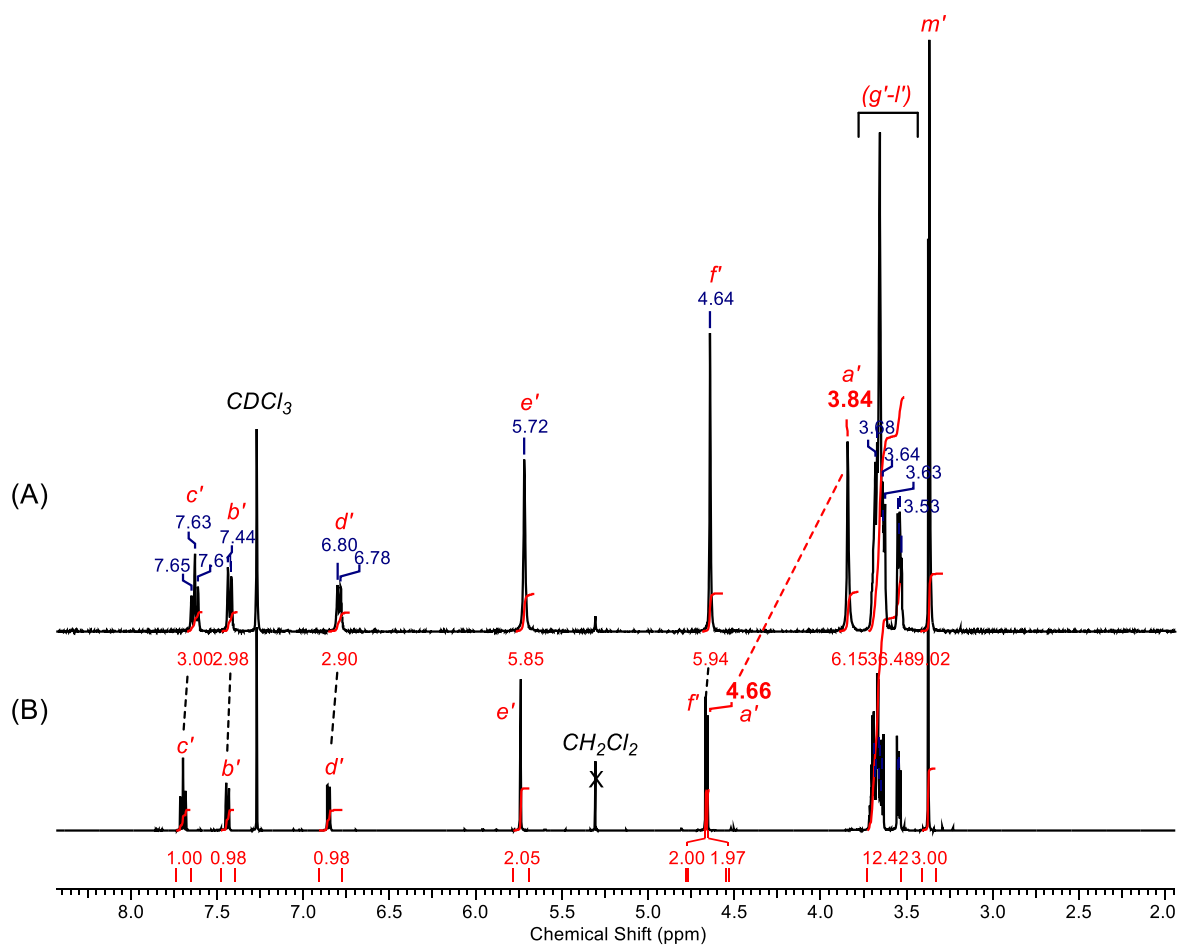

**Figure S37.** Stacked  $^1\text{H}$  NMR spectra of (A) XB trimer **6I** and (B) synthon **5I** in  $\text{CDCl}_3$  (500 MHz,  $T = 298$  K). See Scheme 1 of the main paper for proton assignment.

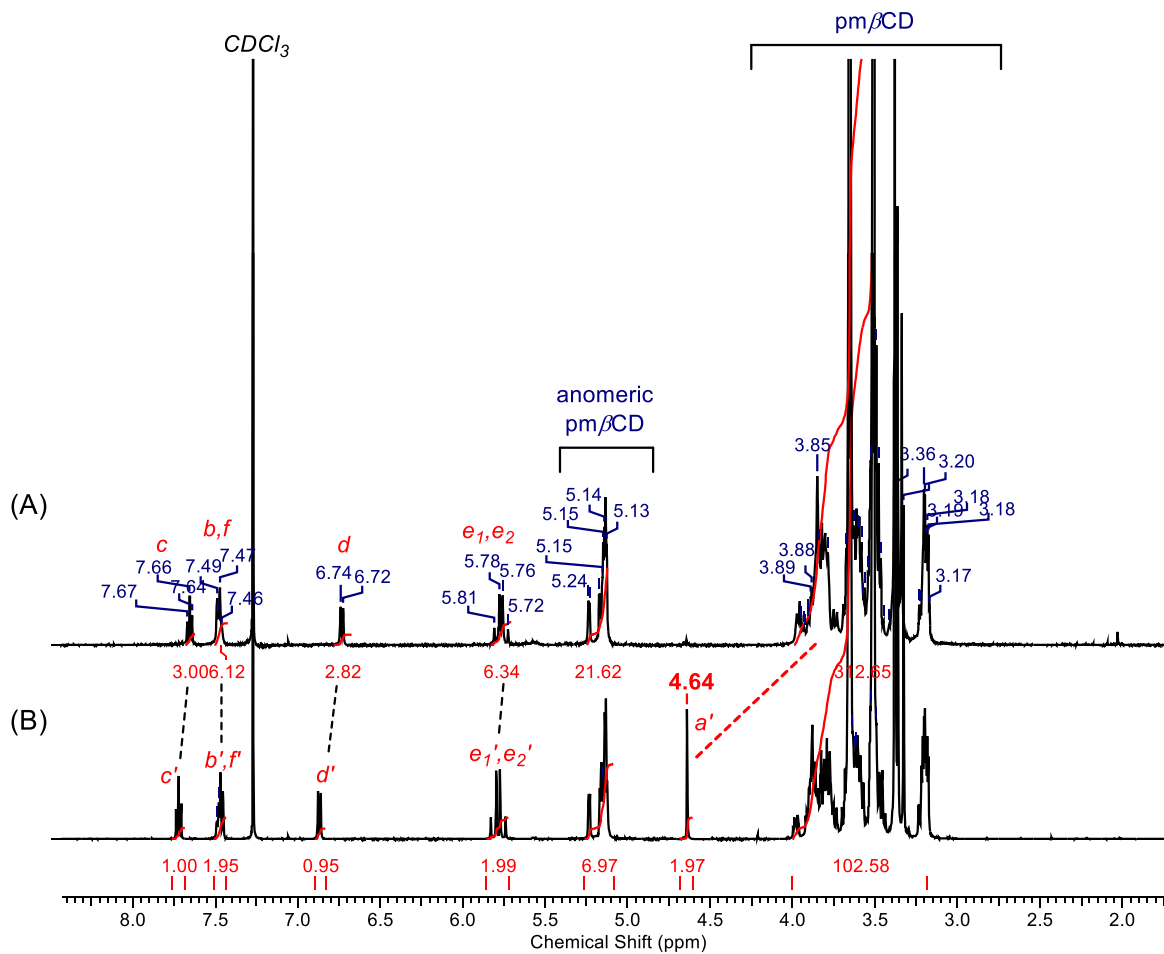

**Figure S38.** Stacked  $^1\text{H}$  NMR spectra of (A) XB trimer **12I** and (B) synthon **11I** in  $\text{CDCl}_3$  (500 MHz,  $T = 298\text{ K}$ ). See Scheme 2 of the main paper for proton assignment. (The methylene  $\text{H}_e$  protons of both compounds are diastereotopic and hence appear as an AB quartet signal).

### S3.3 UV-vis, EPR and HR-MS spectra of XB, HB Cu(II)-receptors

#### Tripodal XB Cu(II) receptor, 11-2OTf

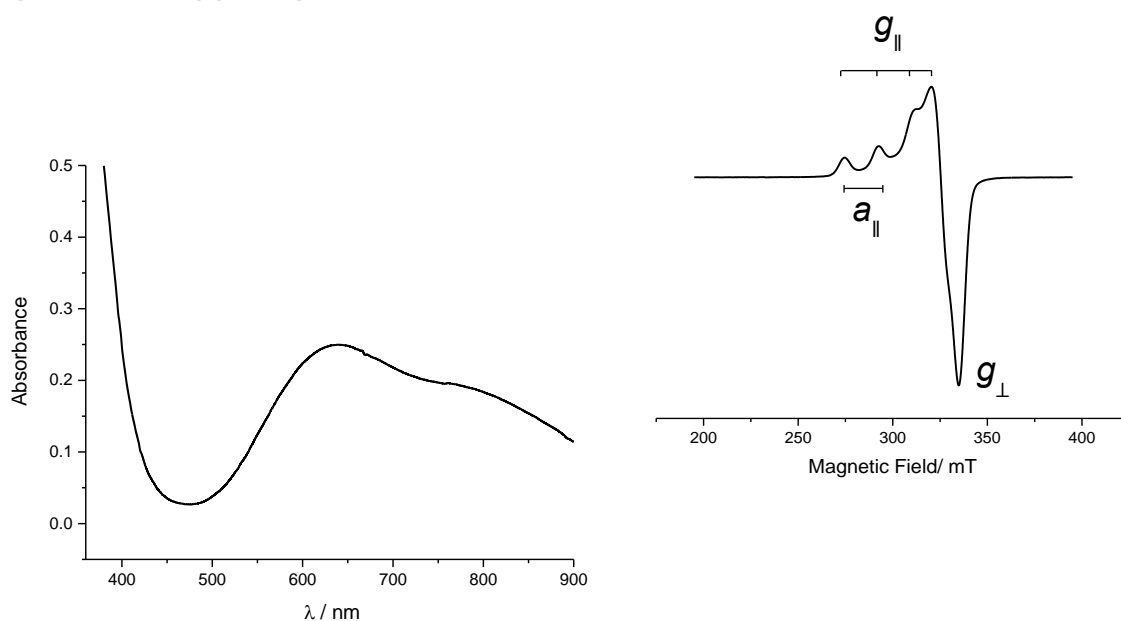

**Figure S39.** (left) UV-vis spectrum of **11-2OTf** in CH<sub>3</sub>CN/ H<sub>2</sub>O 6:4 v/v, 10 mM HEPES ([host] = 2 mM,  $T = 293$  K): peak absorption wavelengths  $\lambda_{\text{abs,max}}$  ( $\epsilon/ \text{M}^{-1} \text{cm}^{-1}$ ) at 647 nm (117) and 775 nm (91) (shoulder); (right) the corresponding X-band EPR spectrum in frozen solution ( $T = 85$  K):  $g_{\parallel} = 2.225$  and  $g_{\perp} = 2.056$  ( $A_{\parallel} = 183.0 \times 10^{-4} \text{cm}^{-1}$ ).

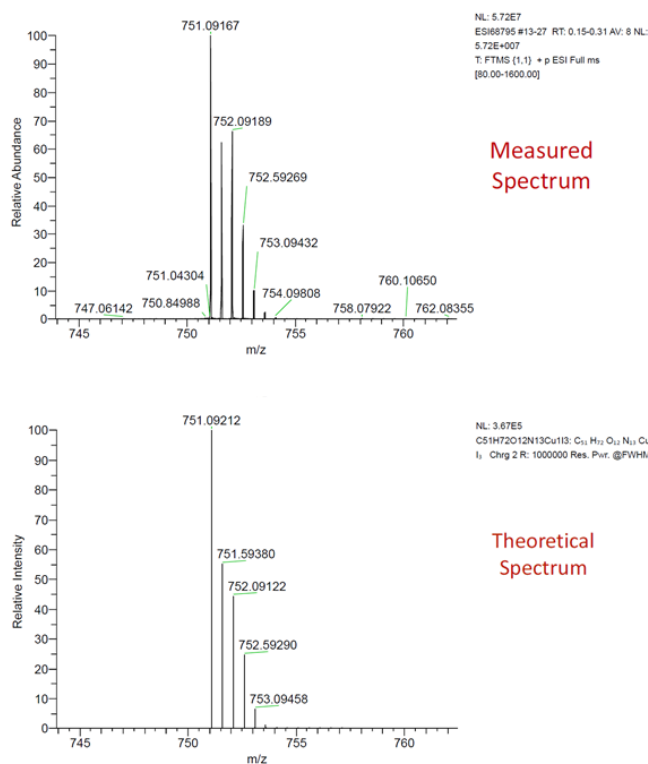

**Figure S40.** High-resolution mass spectrum of receptor **11-2OTf**.

## Tripodal HB Cu(II)-receptor, 1H-2OTf

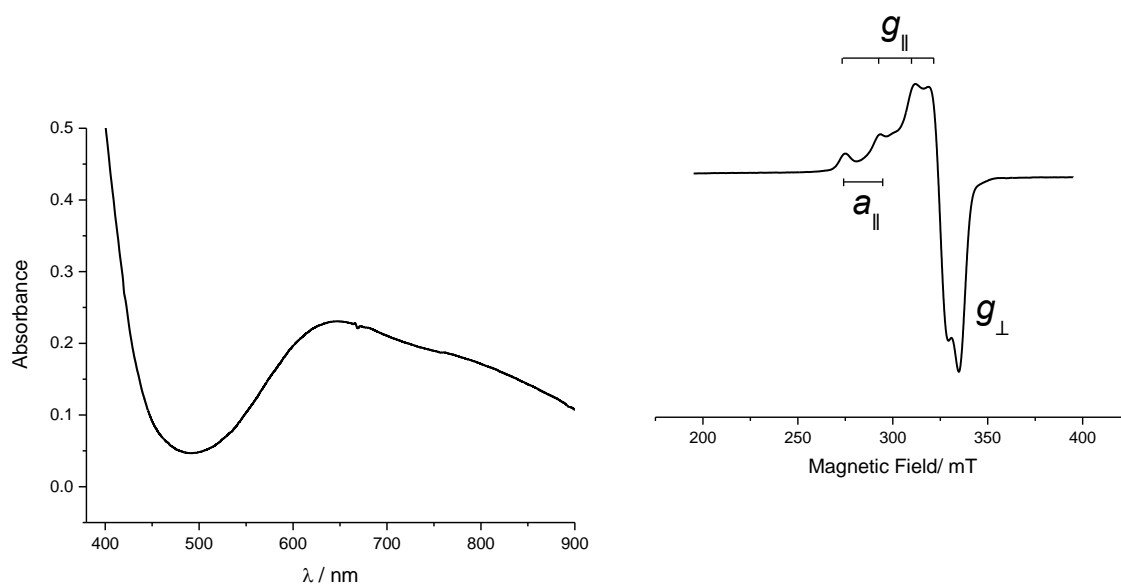

**Figure S41.** (left) UV-vis spectrum of **1H-2OTf** in CH<sub>3</sub>CN/ H<sub>2</sub>O 6:4 v/v, 10 mM HEPES ([host] = 2 mM,  $T = 293$  K): peak absorption wavelengths  $\lambda_{\text{abs,max}}$  ( $\epsilon/ \text{M}^{-1} \text{cm}^{-1}$ ) at 639 nm (125) and 760 nm (98) (shoulder); (right) the corresponding X-band EPR spectrum in frozen solution ( $T = 85$  K):  $g_{\parallel} = 2.285$  and  $g_{\perp} = 2.055$  ( $A_{\parallel} = 180.0 \times 10^{-4} \text{cm}^{-1}$ ).

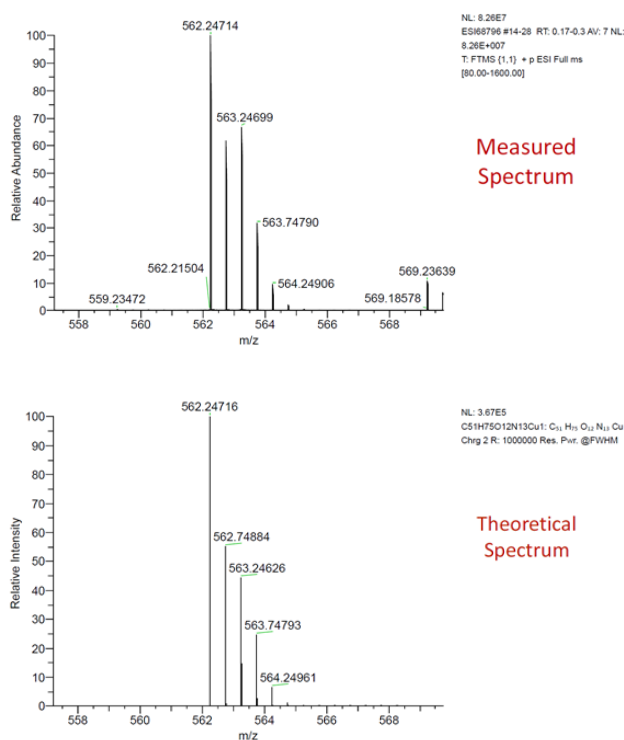

**Figure S42.** High-resolution mass spectrum of receptor **1H-2OTf**.

## Tripodal XB Cu(II) receptor, 13I-2OTf

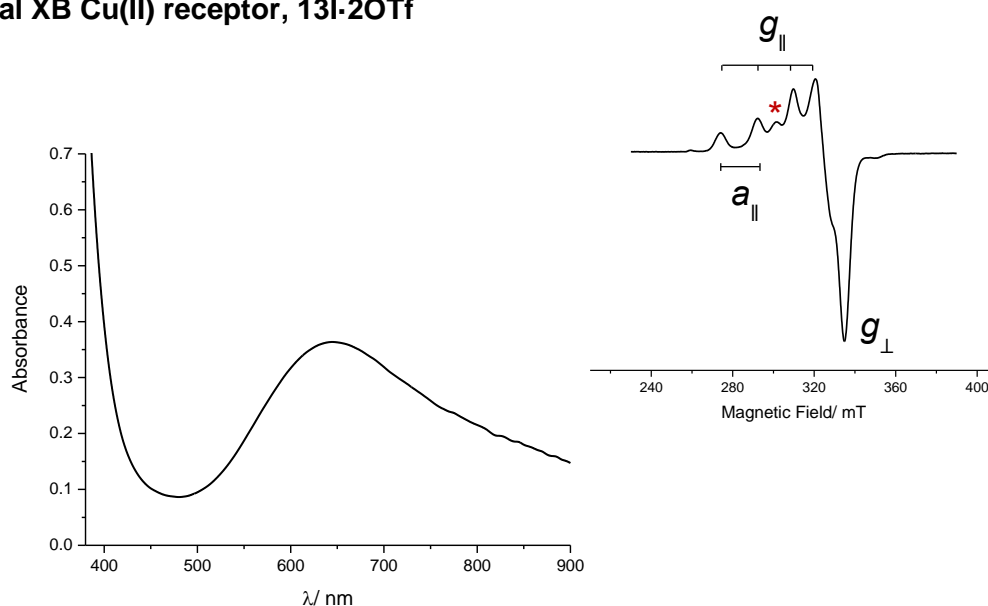

**Figure S43.** (left) UV-vis spectrum of **13I-2OTf** in CH<sub>3</sub>CN/ H<sub>2</sub>O 6:4 v/v, 10 mM HEPES (2 mM,  $T = 293$  K): peak absorption wavelengths  $\lambda_{\text{abs,max}}$  ( $\epsilon/ \text{M}^{-1} \text{cm}^{-1}$ ) at 645 nm (182) and 770 nm (119) (shoulder); (right) the corresponding X-band EPR spectrum in frozen solution ( $T = 85$  K):  $g_{\parallel} = 2.225$  and  $g_{\perp} = 2.065$  ( $A_{11} = 185.0 \times 10^{-4} \text{cm}^{-1}$ ,  $A_{22} = 220.0 \times 10^{-4} \text{cm}^{-1}$ ).

*N.B. the asterisk denotes a smaller, secondary component of the EPR spectral signature, which is suggestive of a minority receptor species where there is a subtle difference in the coordination geometry of the Cu(II) center compared to that discussed in the main paper – possibly, a consequence of the nature of the sterically bulky pm $\beta$ CD-appendages which affect the metal's coordination sphere in frozen solution.*

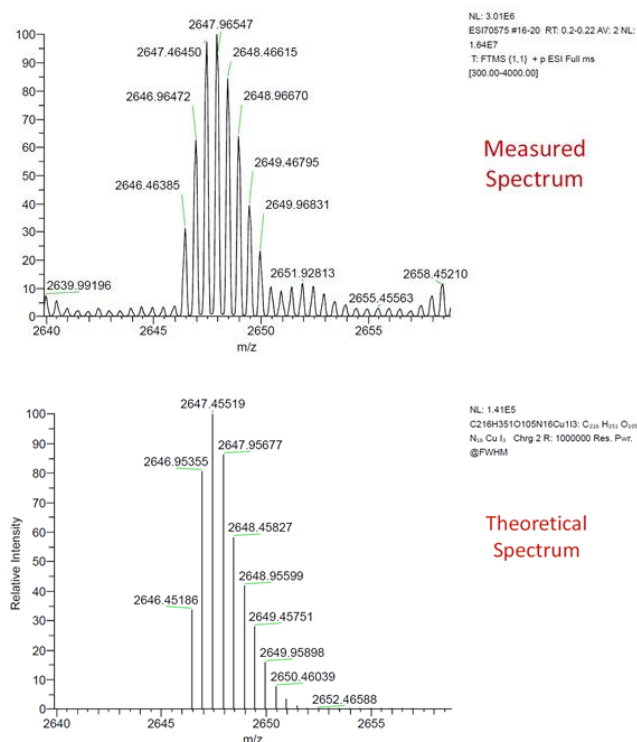

**Figure S44.** High-resolution mass spectrum of receptor **13I-2OTf**.

## S4. Isothermal Titration Calorimetry (ITC) Studies and Data

### S4.1 General comments and titration protocols

All isothermal titration calorimetry experiments were performed on a Microcal PEAQ-ITC automated system, utilising unbuffered distilled water at  $T = 298$  K.

#### M<sup>2+</sup> titration protocol for **6I** and **13I**

An initial concentration of the XB tripodal ligand of 0.5 mM was used, with a 4 mM solution of CuOTf<sub>2</sub> added in 35 aliquots. The data from the first addition of 0.5  $\mu$ L was discarded, with data collected for the subsequent 34 additions of 1  $\mu$ L. Heats of dilution were measured by a preliminary titration of individual solutions of the respective metal salt into unbuffered water. Values of  $K_a$  and  $\Delta H$  were calculated using the MicroCal PEAQ-ITC Analysis Software, *via* a non-linear least squares regression fit of the experimental data to the one-set-of-sites model. These values were then used to determine the  $\Delta G$  and  $\Delta S$  values.

## S4.2 ITC Data

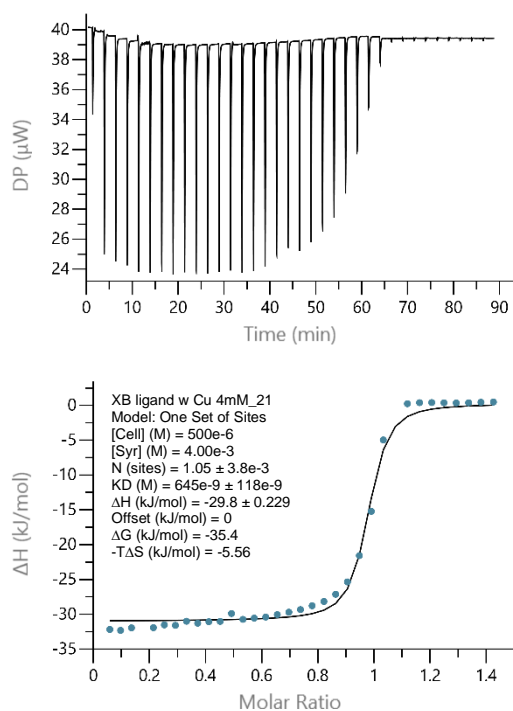

**Figure S45.** (top) Raw ITC data for the sequential addition of  $\text{CuOTf}_2$  to **6I** (unbuffered water,  $T = 298 \text{ K}$ ); (bottom) integrated heat plot obtained from titration.

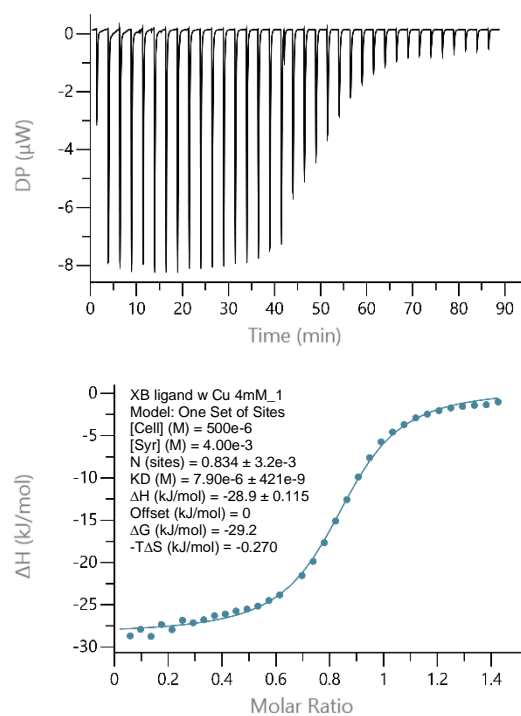

**Figure S46.** (top) Raw ITC data for the sequential addition of  $\text{CuOTf}_2$  to **12I** (unbuffered water,  $T = 298 \text{ K}$ ); (bottom) integrated heat plot obtained from titration.



## S5. UV-vis Experiments

### S5.1 General information and titration protocol

All UV-vis spectroscopy titrations were performed on a T60U (PG Instruments Ltd) spectrophotometer and the data processed using the OriginPro 2015 software package. In each case, titrations were performed in the stated solvent systems at  $T = 293$  K, using a standard 1 mL Hellma quartz cuvette with path length of 1 cm

#### M<sup>2+</sup> titration protocol for **6I** with Cu(II) in CH<sub>3</sub>CN

A 0.75 mL initial volume of the host was used at a concentration of 2 mM. A 15 mM solution of the cationic Cu(II) guest was prepared by dissolving copper triflate salt in a solution containing the same concentration of the host (*i.e.* 2 mM). Aliquots of the Cu(II) solution were added to the UV-vis cuvette, the samples thoroughly mixed using a syringe needle and the absorption spectra recorded at 0, 0.1, 0.2, 0.3, 0.4, 0.5, 0.6, 0.7, 0.8, 0.9, 1.0, 1.2, 1.4, 1.6, 1.8 and 2.0 equivalents of cation (0.1 eq = 10  $\mu$ L). The absorbances for each addition, at a chosen wavelength (640 nm), were used to calculate the delta absorbances relative to the first absorbance reading. These values were then plotted versus the equivalents of the added Cu(II) guest for each aliquot, to obtain a qualitative isotherm which affirmed the expected 1:1 stoichiometry of ligand to metal binding.

#### Anion titration protocol for **1I**·2OTf, **1H**·2OTf and **13I**·2OTf in CH<sub>3</sub>CN/ H<sub>2</sub>O 6:4 v/v (at pH 6.3 with 10 mM HEPES)

In a typical titration experiment, a 0.75 mL initial volume of the host was used at a concentration of 2 mM, with 600 mM solutions of anion guests. Specifically, each of the anion solutions were prepared by dissolving the tetrabutylammonium salt of the desired anion in a solution containing the same concentration of the host (*i.e.* 2 mM), to ensure that the total host concentration remained constant throughout the titration - thus any absorption changes could be reasonably attributed to anion complexation and not dilution effects upon anion addition. Aliquots of anion solutions (1.0 eq = 2.5  $\mu$ L) were added to the UV-vis cuvette, the samples thoroughly mixed using a syringe needle and the changes in the absorption spectra recorded from 0 equivalents to up to 100 equivalents of anion, with at least 15 data sets collected, until saturation of the binding curve was seen. After each aliquot addition, the spectra were recorded at least twice till consistent spectra were obtained. Association constants were calculated from the UV-vis titration data by non-linear global fitting analysis to a host-guest 1:1 or 1:2 stoichiometric binding model (as appropriate) using the Bindfit<sup>7</sup> software, monitoring the change in absorbance in the range 800–850 nm.

*N.B.* The interaction of Cu(II) with the zwitterionic HEPES buffer has previously been shown to be negligible<sup>8</sup> and hence the observed changes in the UV-vis titration spectra were attributed to arise invariably from the interactions of the guest anions with the respective Cu(II)-host.

## S5.2 UV-vis titration data and isotherms

(A) XB Cu(II)-Tripod **1I**·2OTf

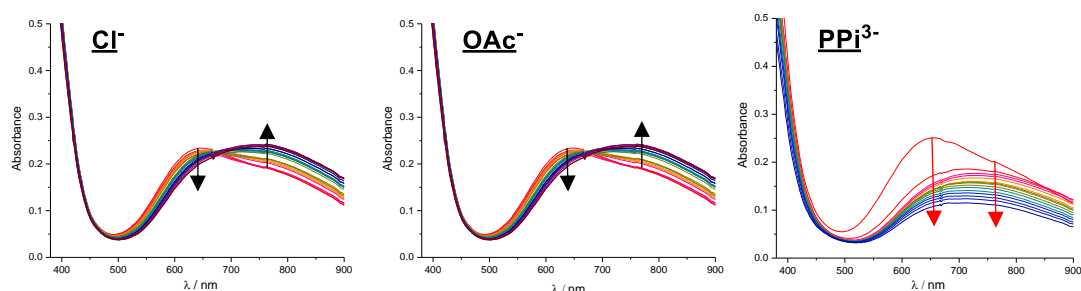

(B) HB Cu(II)-Tripod **1H**·2OTf

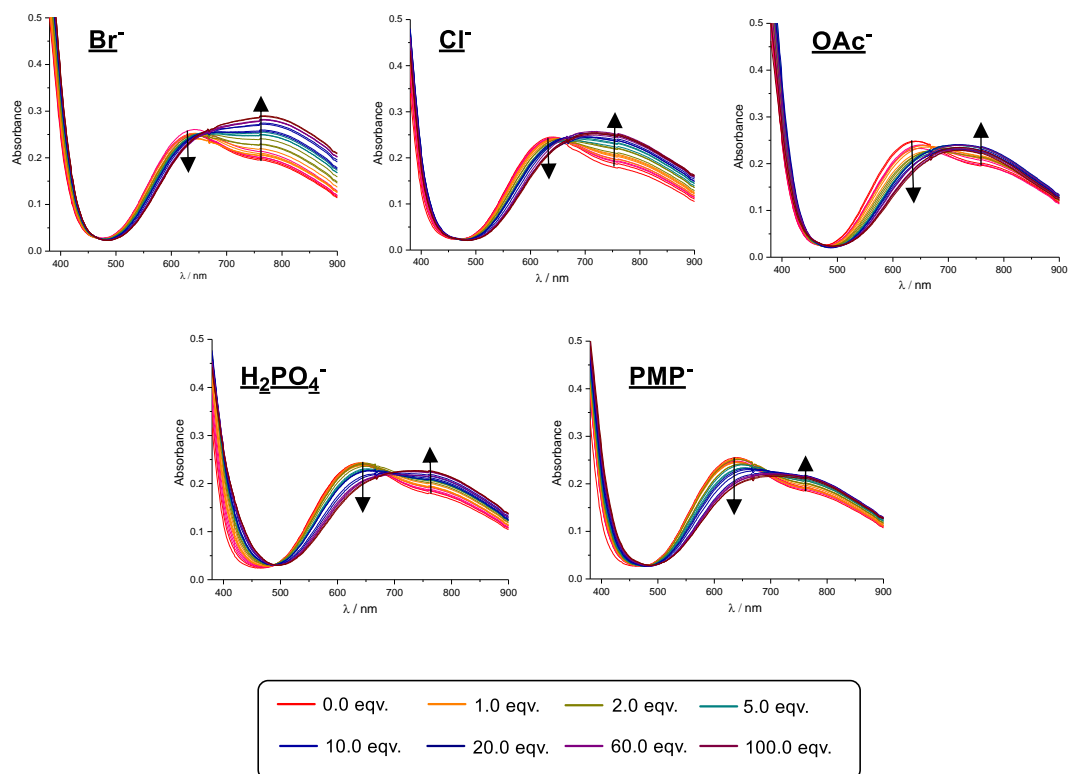

**Figure S47.** UV-vis titration spectra of (A) **1I**·2OTf and (B) **1H**·2OTf in the presence of up to 120 equivalents of various anions ( $[host] = 2 \text{ mM}$ ,  $\text{CH}_3\text{CN}/\text{H}_2\text{O}$  6:4 buffered with 10 mM HEPES at pH 6.3,  $T = 293 \text{ K}$ ).

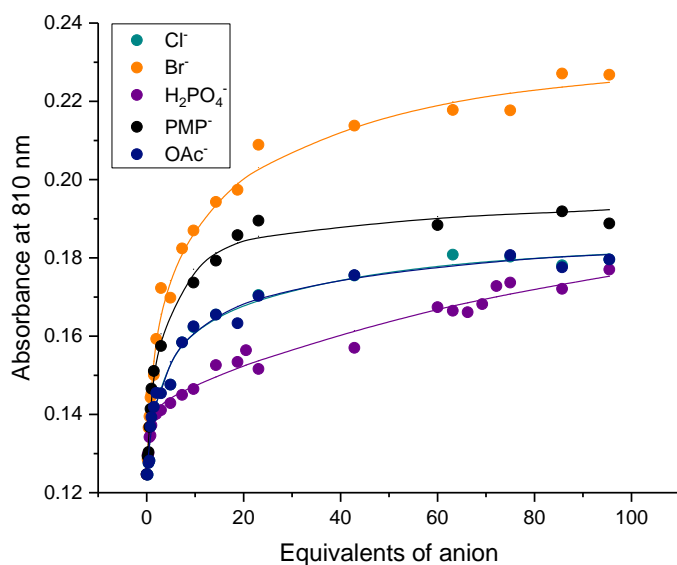

**Figure S48.** Plots of change in absorbance of **1I**·2OTf at 810 nm against equivalents of anion added ([host] = 2 mM, CH<sub>3</sub>CN/H<sub>2</sub>O 6:4 buffered with 10 mM HEPES at pH 6.3, *T* = 293 K).

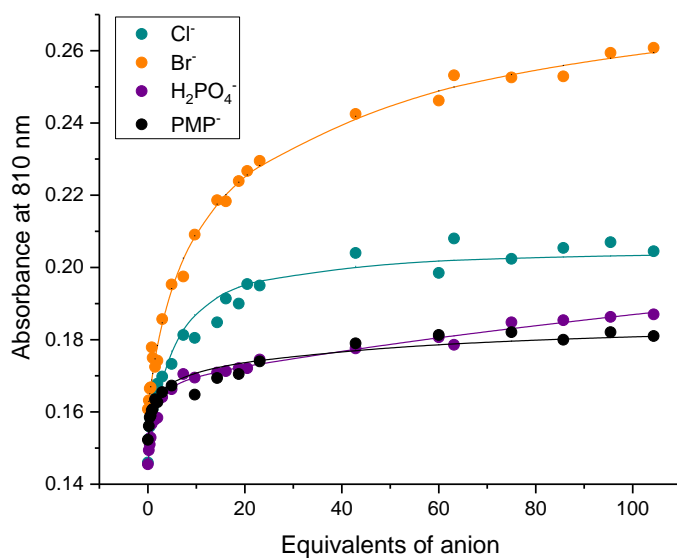

**Figure S49.** Plots of change in absorbance of **1H**·2OTf at 810 nm against equivalents of anion added ([host] = 2 mM, CH<sub>3</sub>CN/H<sub>2</sub>O 6:4 buffered with 10 mM HEPES at pH 6.3, *T* = 293 K).

## S6. EPR Experiments

### S6.1 General information and titration protocol

All EPR spectroscopy titrations were performed on a Bruker EMXmicro continuous wave (CW) spectrometer (X-band) and the data processed using the OriginPro 2015 software package. In each case, titrations were performed in the stated solvent system at  $T = 293$  K and the EPR spectra recorded at  $T = 85$  K.

Anion titration protocol for **1I**·2OTf and **1H**·2OTf in CH<sub>3</sub>CN/ H<sub>2</sub>O 6:4 v/v (at pH 6.3 with 10 mM HEPES)

In a typical titration experiment, a 0.75 mL initial volume of the host was used at a concentration of 2 mM, with 600 mM solutions of anion guests. Specifically, each of the anion solutions were prepared by dissolving the tetrabutylammonium salt of the desired anion in a solution containing the same concentration of the host (*i.e.* 2 mM), to ensure that the total host concentration remained constant throughout the titration - thus any spectral intensity changes could be reasonably attributed to anion complexation and not dilution effects upon anion addition. Aliquots of anion solutions (1.0 eq = 2.5  $\mu$ L) were added to a solution of the host in a cuvette, the sample thoroughly mixed using a syringe needle and 100  $\mu$ L of this host-guest solution taken for the EPR measurement. The sample solution in the EPR tube was then recombined with the rest of the solution in the cuvette, and the procedure repeated with the next addition of anion equivalents (up to 100 equivalents). At least 15 data sets of the changes in the EPR spectra were recorded, until saturation of the binding curve was seen. Anion association constants were calculated from the EPR titration data by non-linear global fitting analysis to a host-guest 1:2 stoichiometric binding model using the Bindfit<sup>7</sup> software, monitoring the change in spectral signature intensity in the range 280-290 mT for both XB/HB receptors.

## S7. Electrochemical Anion Sensing Studies

### S7.1 General comments and titration protocols

All Cyclic voltammetry (CV), differential pulse voltammetry (DPV) and square wave voltammetry (SWV) voltammetric measurements were performed using an Autolab Potentiostat/Galvanostat model PG-STAT 12 (Metrohm Autolab, Netherlands), using a standard single compartment three-electrode electrochemical cell placed inside a Faraday cage and the data processed using the OriginPro 2015 software package. In each case, titrations were performed in the stated solvent systems at  $T = 293$  K.

#### Titration protocol for **1I**·2OTf and **1H**·2OTf in CH<sub>3</sub>CN

The same three-electrode cell was used with the same working and counter electrodes as stated above except using a Ag/ AgCl (3.4 M KCl) leak-free reference electrode (Innovative Instruments) in a 0.1 M TBAClO<sub>4</sub> supporting electrolyte solution. All experiments were conducted in Argon purged solutions under an Argon blanket. The working electrode was polished with alumina slurry (0.05 μm) before each experiment. (In order to circumvent the development of junction potentials of the latter reference electrode in the presence of various ions a Ag/ AgCl reference electrode with a Pt wire frit was utilized for titration experiments). Prior to performing redox titration experiments, the redox reversibility of each receptor was first studied by recording successive CV scans at scan rates of 25, 50, 75, 100, 200, 400, 600 and 800 mV s<sup>-1</sup>. After establishing receptor redox quasi-reversibility and reproducibility of each receptor's Cu<sup>I</sup>/Cu<sup>II</sup>  $E_{1/2}$  value, electrochemical SWV titrations were carried out using a 0.9 mL initial volume of the host at a concentration of 0.5 mM and the measurements recorded with 1 s equilibration time, utilising a frequency of 25 Hz, an amplitude of 20 mV and a step potential of 2 mV. A 100 mM solution of TBA Br was added in aliquots, the samples thoroughly mixed by mechanical agitation and the voltammograms recorded at 0, 1.0, 2.0, 10.0, 20.0, 35.0, 60.0 and 100.0 equivalents of anion (1.0 eq = 4.5 μL). The delta  $E_{1/2}$  values were recorded and plotted against the concentration of anion. The resulting binding isotherms were curve fit as described by Schöllhorn.<sup>9</sup>

Electrochemical reversibility studies of **1I**·2OTf and **1H**·2OTf in water were also performed by recording CV scans (at the same scan rates as above) and a SWV voltammogram (using the same parameters as above). The same three-electrode cell was used as above, with the same working, counter and reference electrodes instead in a 0.05 M KPF<sub>6</sub> supporting electrolyte solution. A host solution of 0.25 mM was used for all measurements.

## S7.2 Criteria for reversibility

For a reversible electrochemical system displaying fast electron transfer kinetics, the following criteria needs to be met:

- $E_{pa}$  and  $E_{pc}$  independent of scan rate
- $I_{pa} / I_{pc} = 1$
- $\Delta E_p = (E_{pa} - E_{pc}) = (59/n)$  mV, where  $n$  is the number of electrons transferred during the redox process. Therefore, for a one-electron transfer process, the difference = 59 mV.
- $I_{pa}$  and  $I_{pc}$  varies proportionally to the square root of the scan rate.

For all of the following receptors described herein,  $E_{pa}$  and  $E_{pc}$  were almost independent of scan rate at lower rates. With a few exceptions,  $I_{pa} / I_{pc}$  are typically in the range of 0.90 – 1.10 and  $\Delta E_p$  show notable variations from 60 mV to 260 mV. In all cases,  $I_{pa}$  and  $I_{pc}$  vary almost proportionally with the square root of the scan rate (Pearsons's  $R^2 > 0.94$ ). Thus the redox-active hosts generally showed 'quasi-reversible' electrochemical behaviour.

### S7.3 Electrochemical Reversibility Studies

#### XB Cu(II)-tripod, 11-2OTf

Studies performed in 0.1 M TBAClO<sub>4</sub> in anhydrous CH<sub>3</sub>CN.

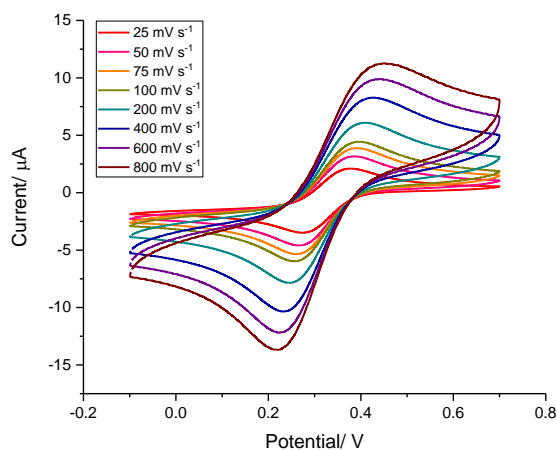

**Figure S50.** CV's of 11-2OTf at different scan rates ([host] = 0.5 mM,  $T = 293$  K).

**Table S1.** Values of  $E_{pc}$ ,  $E_{pa}$ ,  $I_{pc}$ ,  $I_{pa}$ ,  $\Delta E_p$  and  $I_{pa}/I_{pc}$  for 11-2OTf at different scan rates.

| Scan rate/<br>$\text{mV s}^{-1}$ | $E_{pa}/\text{V}$ | $E_{pc}/\text{V}$ | $I_{pa}/\mu\text{A}$ | $I_{pc}/\mu\text{A}$ | $\Delta E_p/\text{V}$ | $I_{pa}/I_{pc}$ |
|----------------------------------|-------------------|-------------------|----------------------|----------------------|-----------------------|-----------------|
| 25                               | 0.381             | 0.268             | 3.119                | 3.284                | 0.113                 | 0.949           |
| 50                               | 0.391             | 0.266             | 4.143                | 4.372                | 0.125                 | 0.948           |
| 75                               | 0.393             | 0.261             | 4.764                | 5.173                | 0.132                 | 0.921           |
| 100                              | 0.395             | 0.256             | 5.219                | 5.683                | 0.139                 | 0.918           |
| 200                              | 0.403             | 0.246             | 6.839                | 7.441                | 0.157                 | 0.919           |
| 400                              | 0.422             | 0.232             | 8.808                | 9.957                | 0.19                  | 0.885           |
| 600                              | 0.439             | 0.222             | 9.947                | 11.297               | 0.217                 | 0.880           |
| 800                              | 0.481             | 0.219             | 10.084               | 12.149               | 0.262                 | 0.830           |

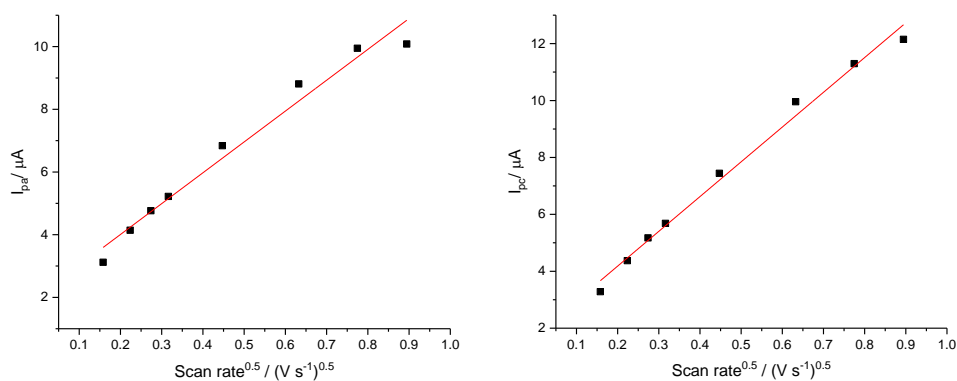

**Figure S51.** Plots of (left)  $I_{pa}$  and (right)  $I_{pc}$  against  $(\text{scan rate})^{1/2}$  for 11-2OTf.

## HB Cu(II)-tripod, 1H-2OTf

Studies performed in 0.1 M TBAClO<sub>4</sub> in anhydrous CH<sub>3</sub>CN.

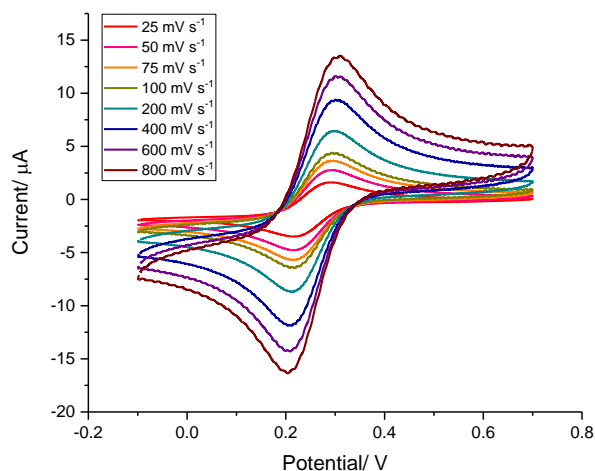

**Figure S52.** CV's of 1H-2OTf at different scan rates ([host] = 0.5 mM,  $T = 293$  K).

**Table S2.** Values of  $E_{pc}$ ,  $E_{pa}$ ,  $I_{pc}$ ,  $I_{pa}$ ,  $\Delta E_p$  and  $I_{pa}/I_{pc}$  for 1H-2OTf at different scan rates.

| Scan rate/<br>$\text{mV s}^{-1}$ | $E_{pa}/\text{V}$ | $E_{pc}/\text{V}$ | $I_{pa}/\mu\text{A}$ | $I_{pc}/\mu\text{A}$ | $\Delta E_p/\text{V}$ | $I_{pa}/I_{pc}$ |
|----------------------------------|-------------------|-------------------|----------------------|----------------------|-----------------------|-----------------|
| 25                               | 0.288             | 0.219             | 2.951                | 2.883                | 0.069                 | 1.024           |
| 50                               | 0.290             | 0.215             | 4.191                | 4.192                | 0.075                 | 0.999           |
| 75                               | 0.295             | 0.210             | 5.051                | 5.074                | 0.085                 | 0.995           |
| 100                              | 0.293             | 0.210             | 5.744                | 5.839                | 0.083                 | 0.984           |
| 200                              | 0.295             | 0.210             | 8.029                | 8.384                | 0.085                 | 0.958           |
| 400                              | 0.300             | 0.205             | 10.981               | 11.442               | 0.095                 | 0.959           |
| 600                              | 0.302             | 0.205             | 13.161               | 13.821               | 0.097                 | 0.952           |
| 800                              | 0.310             | 0.202             | 14.892               | 15.642               | 0.108                 | 0.952           |

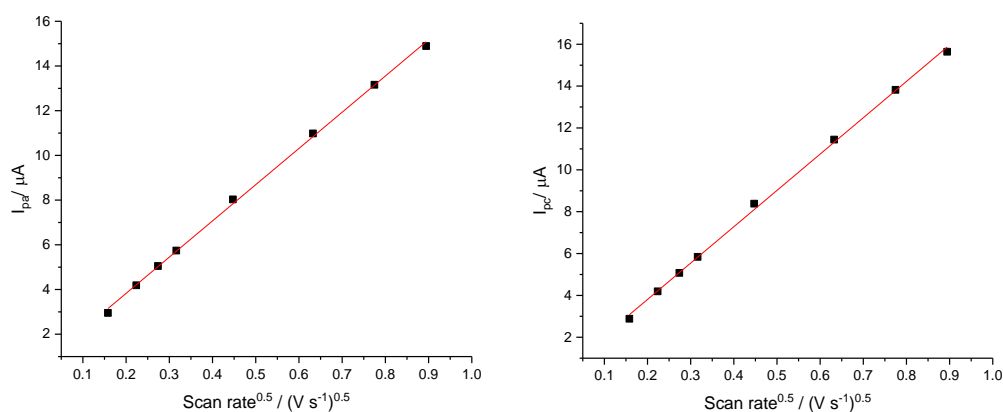

**Figure S53.** Plots of (left)  $I_{pa}$  and (right)  $I_{pc}$  against  $(\text{scan rate})^{1/2}$  for 1H-2OTf.



## XB Cu(II)-tripod, 11-2OTf

Studies performed in 0.05 M KPF<sub>6</sub> in pure H<sub>2</sub>O.

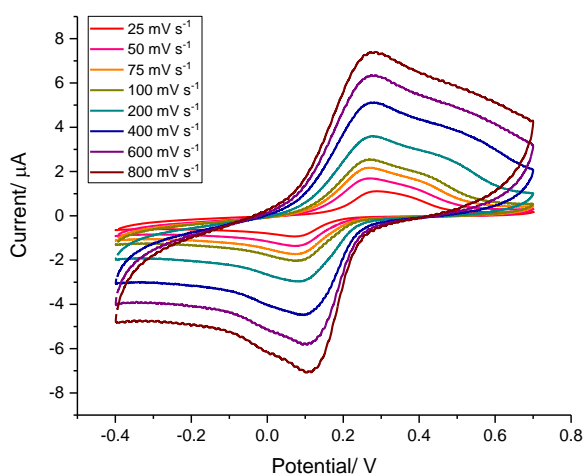

**Figure S54.** CV's of 11-2OTf at different scan rates ([host] = 0.25 mM,  $T = 293$  K).

**Table S3.** Values of  $E_{pc}$ ,  $E_{pa}$ ,  $I_{pc}$ ,  $I_{pa}$ ,  $\Delta E_p$  and  $I_{pa}/I_{pc}$  for 11-2OTf at different scan rates.

| Scan rate/<br>$\text{mV s}^{-1}$ | $E_{pa}/\text{V}$ | $E_{pd}/\text{V}$ | $I_{pa}/\mu\text{A}$ | $I_{pc}/\mu\text{A}$ | $\Delta E_p/\text{V}$ | $I_{pa}/I_{pc}$ |
|----------------------------------|-------------------|-------------------|----------------------|----------------------|-----------------------|-----------------|
| 25                               | 0.291             | 0.071             | 1.021                | 1.016                | 0.22                  | 1.005           |
| 50                               | 0.269             | 0.079             | 1.515                | 1.553                | 0.19                  | 0.976           |
| 75                               | 0.269             | 0.078             | 2.046                | 1.844                | 0.191                 | 1.109           |
| 100                              | 0.271             | 0.081             | 2.259                | 2.521                | 0.19                  | 0.896           |
| 200                              | 0.279             | 0.083             | 3.286                | 3.225                | 0.196                 | 1.019           |
| 400                              | 0.279             | 0.096             | 4.842                | 4.771                | 0.183                 | 1.015           |
| 600                              | 0.276             | 0.105             | 6.159                | 5.913                | 0.171                 | 1.042           |
| 800                              | 0.276             | 0.115             | 6.968                | 7.493                | 0.161                 | 0.929           |

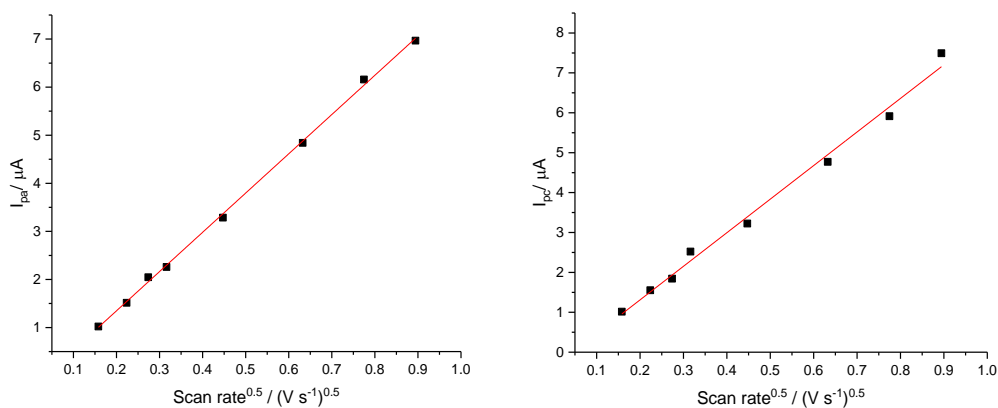

**Figure S55.** Plots of (left)  $I_{pa}$  and (right)  $I_{pc}$  against  $(\text{scan rate})^{1/2}$  for 11-2OTf.

## HB Cu(II)-tripod, 1H-2OTf

Studies performed in 0.05 M KPF<sub>6</sub> in pure H<sub>2</sub>O.

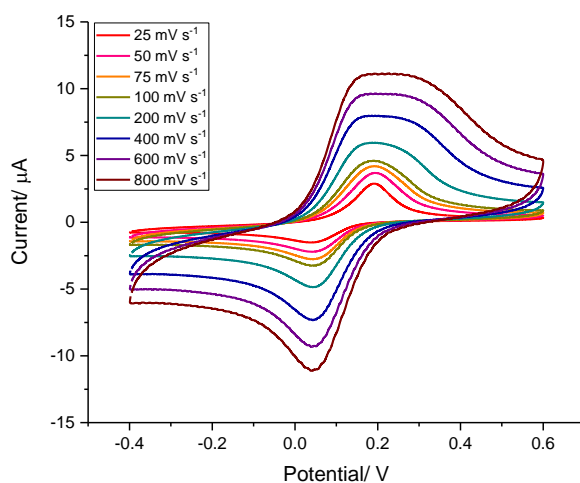

**Figure S56.** CV's of 1H-2OTf at different scan rates ([host] = 0.25 mM,  $T = 293$  K).

**Table S4.** Values of  $E_{pc}$ ,  $E_{pa}$ ,  $I_{pc}$ ,  $I_{pa}$ ,  $\Delta E$  and  $I_{pa}/I_{pc}$  for 1H-2OTf at different scan rates.

| Scan rate/<br>mV s <sup>-1</sup> | $E_{pa}/V$ | $E_{pd}/V$ | $I_{pa}/\mu A$ | $I_{pc}/\mu A$ | $\Delta E_p/V$ | $I_{pa}/I_{pc}$ |
|----------------------------------|------------|------------|----------------|----------------|----------------|-----------------|
| 25                               | 0.191      | 0.039      | 2.726          | 1.667          | 0.152          | 1.635           |
| 50                               | 0.19       | 0.037      | 3.507          | 2.395          | 0.153          | 1.464           |
| 75                               | 0.191      | 0.044      | 3.918          | 3.304          | 0.147          | 1.186           |
| 100                              | 0.191      | 0.042      | 4.244          | 3.640          | 0.149          | 1.166           |
| 200                              | 0.193      | 0.044      | 5.476          | 5.355          | 0.149          | 1.023           |
| 400                              | 0.196      | 0.044      | 7.406          | 7.919          | 0.152          | 0.935           |
| 600                              | 0.205      | 0.044      | 9.198          | 9.781          | 0.161          | 0.940           |
| 800                              | 0.203      | 0.041      | 10.728         | 11.501         | 0.162          | 0.933           |

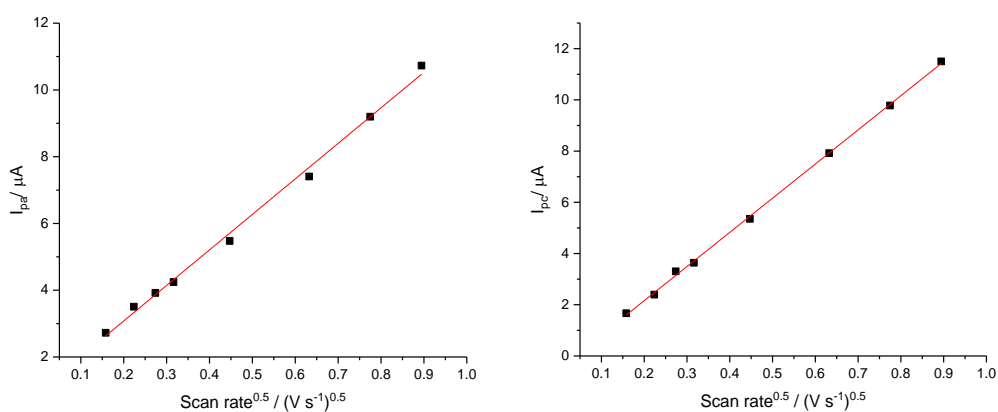

**Figure S57.** Plots of (left)  $I_{pa}$  and (right)  $I_{pc}$  against (scan rate)<sup>1/2</sup> for 1H-2OTf.

## S8. References

- 1 B.-Y. Lee, S. R. Park, H. B. Jeon and K. S. Kim, *Tetrahedron Lett.*, 2006, **47**, 5105–5109.
- 2 T. Zhang and E. V. Anslyn, *Tetrahedron*, 2004, **60**, 11117–11124.
- 3 T. Shiraki, A. Dawn, Y. Tsuchiya and S. Shinkai, *J. Am. Chem. Soc.*, 2010, **132**, 13928–13935.
- 4 J. Chao, W.-Y. Huang, J. Wang, S.-J. Xiao, Y.-C. Tang and J.-N. Liu, *Biomacromolecules*, 2009, **10**, 877–883.
- 5 T. Bunchuay, A. Docker, A. J. Martinez-Martinez and P. D. Beer, *Angew. Chem. Int. Ed.*, 2019, **58**, 13823–13827.
- 6 M. J. Langton, S. W. Robinson, I. Marques, V. Félix and P. D. Beer, *Nat. Chem.*, 2014, **6**, 1039–1043.
- 7 P. Thordarson, *Chem. Soc. Rev.*, 2011, **40**, 1305–1323.
- 8 S. L. Tobey and E. V. Anslyn, *J. Am. Chem. Soc.*, 2003, **125**, 14807–14815.
- 9 R. Oliveira, S. Groni, C. Fave, M. Branca, F. Mavré, D. Lorcy, M. Fourmigué and B. Schöllhorn, *Phys. Chem. Chem. Phys.*, 2016, **18**, 15867–15873.
